# Supplementary material for: Sex Differences in Disease Profiles, Management, and Outcomes Among People with Atrial Fibrillation After Ischemic Stroke: Aggregated and Individual Participant Data Meta-Analyses
Source: PubMed Central journal article supplement (PMC7784810; doi:10.1089/whr.2020.0029), 2020-06-30

**Supplementary Table S1. Atrial Fibrillation and Functional Outcome Measurement in Each Study**

| Study                               | Study year                                                                                                                                                                                                                                                                                                                                                                           |
|-------------------------------------|--------------------------------------------------------------------------------------------------------------------------------------------------------------------------------------------------------------------------------------------------------------------------------------------------------------------------------------------------------------------------------------|
| Joinville, Brazil <sup>51</sup>     | A self-reported history of known AF was obtained from patients or their relatives by research nurses.<br>Functional outcomes were determined using mRS by research nurses using telephone.                                                                                                                                                                                           |
| Melbourne, Australia <sup>52</sup>  | AF was defined as either a known history or current presentation confirmed on ECG.<br>Functional outcomes at 1 and 5 years were determined using BI by research nurses in a face-to-face interview.                                                                                                                                                                                  |
| Arcadia, Greece <sup>53</sup>       | AF was diagnosed by ECG for hospitalized patients; for those not hospitalized, $\geq 1$ ECG with documentation of AF in the last year before the event was required.<br>Functional outcomes at 1 year were determined using mRS by attending physicians face to face.                                                                                                                |
| Perth, Australia <sup>54</sup>      | The presence of AF needed to be confirmed by an ECG within 1 month of the onset of stroke.<br>Patients not known to be deceased were sent a letter of invitation, which was followed by a telephone call or home visit. Functional outcomes at 1 year were determined using mRS. Those who agreed to participate were assessed at their usual place of residence by the study nurse. |
| Orebro, Sweden <sup>55</sup>        | AF was self reported by patients.<br>The functional outcomes at 1 year were measured using mRS during consultation visits or telephone interviews.                                                                                                                                                                                                                                   |
| Porto, Portugal <sup>56</sup>       | The presence of AF was confirmed by ECG<br>Functional outcomes at 1 and 7 years were determined using mRS by study neurologists.<br>Patients who collaborated but were not willing to complete the consultation were contacted by phone, and for those unable to come to the hospital, home visits were scheduled. Functional outcome was measured using the mRS.                    |
| Auckland, New Zealand <sup>57</sup> | A self-reported history of AF was obtained from patients or their relatives and then confirmed by medical records.<br>Face-to-face interviews occurred at participants' usual places of residence and included neuropsychological tests and assessment of functional outcome at 5 years (the mRS) after stroke.                                                                      |
| L'Aquila, Italy <sup>58,59</sup>    | AF was confirmed by a standard 12-lead ECG.<br>Functional outcome assessments were not available.                                                                                                                                                                                                                                                                                    |
| Tartu, Estonia <sup>510</sup>       | AF was confirmed by ECG<br>The mRS assessments were made by the study physician by telephone at 1 year and 4 years after stroke.                                                                                                                                                                                                                                                     |

AF, atrial fibrillation; BI, Barthel Index; mRS, modified Rankin Scale.

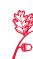

**Supplementary Table S2. Characteristics of Included Studies**

| Authors and year of publication        | Country and city         | Total case         | Study type                                                       | Population | Female  |           |          |                     | Male                              |         |           |          |                     |                                   |
|----------------------------------------|--------------------------|--------------------|------------------------------------------------------------------|------------|---------|-----------|----------|---------------------|-----------------------------------|---------|-----------|----------|---------------------|-----------------------------------|
|                                        |                          |                    |                                                                  |            | n       | No. of AF | %AF      | Age                 | NIHSS                             | n       | No. of AF | %AF      | Age (years)         | NIHSS                             |
| Kent 2005 <sup>511</sup>               | International            | 2,178              | Randomized controlled trial                                      | IS         | 988     | 195       | 19.7     | 66.5 (11.5)         | 13.0 (6.4)                        | 1,190   | 213       | 17.9     | 65.4 (11.3)         | 13.0 (6.8)                        |
| Lasek-Bal 2014 <sup>512</sup>          | Poland                   | 511                | Observational clinical cohort study                              | IS         | 304     | 101       | 33.2     | 74 (66-81)          | 7.1                               | 207     | 41        | 19.8     | 70 (61-77)          | 5.63                              |
| Akanaksha 2017 <sup>513</sup>          | India                    | 203                | Population-based registry                                        | IS&AF      | 83      | 34        | 41       |                     |                                   | 120     | 71        | 59       |                     |                                   |
| Yesilot 2011 <sup>514</sup>            | Turkey, Istanbul         | 1,522              | Hospital registry data                                           | IS         | 751     | 252       | 33.6     | 65.1 (15.3)         | Prestroke mRS3-5 11.5%            | 771     | 144       | 18.7     | 63.6 (14.6)         | Prestroke mRS3-5 5.9%             |
| Irie 2015 <sup>515</sup>               | Fukuoka, Japan           | 6,236              | Population-based registry                                        | IS         | 2,398   | 701       | 29.2     | 73.3 (12.3)         | 4 (2-10)                          | 3,838   | 968       | 25.2     | 68.3 (11.5)         | 4 (2-7)                           |
| Huang 2010 <sup>516</sup>              | China                    | 4,782              | Population-based registry                                        | IS         | 1,810   | 162       | 9        | 66.2 (11.8)         |                                   | 2,972   | 152       | 5        | 63.7 (11.8)         |                                   |
| Hametner 2017 <sup>517</sup>           | International            | 8,028              | Randomized controlled trial                                      | IS         | 3,630   | 1,149     | 31.7     | 74 (65-80)          | 13 (8-18)                         | 4,398   | 1,038     | 23.6     | 70 (60-77)          | 12 (8-17)                         |
| Hametner 2015 <sup>518</sup>           | Germany                  | 1,391              | Observational clinical cohort study                              | IS         | 668     | 272       | 40.7     | 75.3 (12.1)         | 12 (7-17)                         | 723     | 185       | 25.6     | 68.8 (12.7)         | 10 (6-15)                         |
| Gray 2007 <sup>519</sup>               | International            | 1,268              | Randomized controlled trial                                      | IS         | 574     | 69        | 21.3     | 73.4 (10.7)         | Scandinavian Stroke Scale 35 (16) | 694     | 57        | 15.4     | 68.4 (10.8)         | Scandinavian Stroke Scale 36 (18) |
| Nakamura 2016 <sup>520</sup>           | Fukuoka, Japan           | 704                | Population-based registry                                        | IS&AF      | 298     | 42        | 42       |                     |                                   | 406     |           | 58       |                     |                                   |
| Munoz-Rivas 2015 <sup>521</sup>        | Spain                    | 423,475            | Observational study using the Spanish National Hospital Database | IS         | 202,057 | 66,679    | 33       |                     |                                   | 221,418 | 44,979    | 20.3     |                     |                                   |
| Martin-Merino 2011 <sup>522</sup>      | United Kingdom           | 2,953              | Population-based registry                                        | IS         | 1,455   | 233       | 16       |                     |                                   | 1,498   | 188       | 12.6     |                     |                                   |
| Kongbunkiat 2015 <sup>523</sup>        | Thailand                 | 25,319             | Observational study using the Thailand national database system  | IS/PIA&AF  | 14,699  |           | 58.1     |                     |                                   | 10,620  |           | 41.9     |                     |                                   |
| Giralto-Steinhauer 2012 <sup>524</sup> | Barcelona, Spain         | 439                | Hospital registry data                                           | IS/PIA&AF  | 270     |           | 61.50342 |                     |                                   | 169     |           | 38.49658 |                     |                                   |
| Kim 2015 <sup>525</sup>                | Seoul, Republic of Korea | 98                 | Hospital registry data                                           | IS/PIA&AF  | 34      |           | 34.7     |                     |                                   | 64      |           | 65.3     |                     |                                   |
| Heuschmann 2004 <sup>526</sup>         | Germany                  | 1,3440             | Population-based registry                                        | IS         | 5,049   | 1,302     | 25.8     | 73.2 (13)           |                                   | 5,751   | 1,006     | 17.5     | 67.3 (12)           |                                   |
| Candelise 1991 <sup>527</sup>          | Italy                    | 211                | Randomized controlled trial                                      | IS&AF      | 126     |           | 59.71564 |                     |                                   | 85      |           | 40.28436 |                     |                                   |
| Kapral 2006 <sup>528</sup>             | Toronto, Canada          | 586                | Hospital registry data                                           | IS         | 263     | 31        | 12       | 55                  |                                   | 323     | 43        | 13       | 62                  |                                   |
| Kapral 2009 <sup>529</sup>             | Toronto, Canada          | 6,389              | Population-based registry                                        | IS         | 3,096   | 603.72    | 19.5     |                     |                                   | 3,293   | 451.141   | 13.7     |                     |                                   |
| Lin 2011 <sup>530</sup>                | Sichuan, China           | 366                | Hospital registry data                                           | IS&AF      | 216     |           | 59.01639 |                     |                                   | 150     |           | 40.98361 |                     |                                   |
| Lisabeth 2009 <sup>531</sup>           | Michigan, United States  | 461                | Hospital registry data                                           | IS/PIA     | 224     | 49        | 21.9     |                     |                                   | 237     | 37        | 15.6     |                     |                                   |
| Lisabeth 2004 <sup>532</sup>           | Michigan, United States  | 2,715              | Medicare population                                              | IS/PIA     | 1,522   | 179.596   | 11.8     |                     |                                   | 1,193   | 150.318   | 12.6     |                     |                                   |
| Lorenzano 2013 <sup>533</sup>          | International            | 45,079             | Population-based registry                                        | IS         | 18,777  | 5,603     | 29.8     |                     |                                   | 25,219  | 5,372     | 21.3     |                     |                                   |
| Marini, 2005 <sup>534</sup>            | L'Aquila, Italy          | 3,530 <sup>a</sup> | Population-based registry                                        | IS         | 1,854   | 529       | 60.9     | AGE IS NOT REPORTED |                                   | 1,676   | 340       | 39.1     | AGE IS NOT REPORTED |                                   |
| Martinez-Sanchez 2011 <sup>534</sup>   | Madrid, Spain            | 310                | Observational clinical cohort study                              | IS         | 128     | 8         | 6.3      |                     |                                   | 182     | 10        | 5.5      |                     |                                   |

(continued)

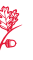

Supplementary Table S2. (Continued)

| Authors and year of publication        | Country and city                    | Total case | Study type                                 | Population           | Female |           |      |             | Male                                |        |           |      |             |                                     |
|----------------------------------------|-------------------------------------|------------|--------------------------------------------|----------------------|--------|-----------|------|-------------|-------------------------------------|--------|-----------|------|-------------|-------------------------------------|
|                                        |                                     |            |                                            |                      | n      | No. of AF | %AF  | Age         | NIHSS                               | n      | No. of AF | %AF  | Age (years) | NIHSS                               |
| Mcdermott 2017 <sup>S35</sup>          | Texas, United States                | 757        | Population-based brain attack surveillance | IS                   | 391    | 68        | 17.4 | 72 (60.81)  | 5                                   | 366    | 45        | 12.3 | 65 (57.77)  | 4                                   |
| Meseguer 2009 <sup>S36</sup>           | Paris, France                       | 274        | Hospital registry data                     | IS&thrombolysis      | 111    | 39        | 35.2 | 70.6 (16.1) | 12 (7-17)                           | 163    | 38        | 23.3 | 62.7 (13.9) | 15 (9-19)                           |
| Mizrahi 2011 <sup>S37</sup>            | Israel                              | 707        | Hospital registry data                     | IS                   | 303    | 79        | 26.1 |             |                                     | 404    | 47        | 11.6 |             |                                     |
| Nagaraja 2012 <sup>S38</sup>           | Detroit, United States              | 602        | Hospital registry data                     | IS                   | 320    | 51        | 15.9 |             |                                     | 282    | 34        | 12.1 |             |                                     |
| Mizrahi 2012 <sup>S39</sup>            | Israel                              | 919        | Observational clinical cohort study        | IS                   | 405    | 246       | 60.7 | 76.2 (7.9)  |                                     | 514    | 202       | 39.3 | 75.3 (8.0)  |                                     |
| Olsen and Andersen 2010 <sup>S40</sup> | Denmark                             | 4,015      | National Stroke registry                   | IS                   | 19,301 | 3,443     | 17.8 | 74.5        |                                     | 20,854 | 2,860     | 13.7 | 69.7        |                                     |
| Padjen 2013 <sup>S41</sup>             | Lille, France, and Belgrade, Serbia | 734        | Observational clinical cohort study        | IS&thrombolysis      | 347    | 90        | 25.9 |             |                                     | 387    | 65        | 16.8 |             |                                     |
| Rodriguez-Campello 2016 <sup>S42</sup> | Barcelona, Spain                    | 388        | Observational clinical cohort study        | IS                   | 140    | 24        | 17.1 |             |                                     | 248    | 31        | 12.5 |             |                                     |
| Siiva 2010 <sup>S43</sup>              | Brazil                              | 676        | Hospital registry data                     | IS                   | 322    | 81        | 25.2 | 72.2 (15.8) | mrs >0 35.2%                        | 354    | 66        | 18.6 | 65 (13.9)   | mrs >0 24%                          |
| Smith 2005 <sup>S44</sup>              | Texas, United States                | 381        | Population-based Brain Attack Surveillance | IS                   | 220    | 28        | 12.7 |             |                                     | 161    | 21        | 13   |             |                                     |
| Spaander 2017 <sup>S45</sup>           | Europe                              | 9,495      | Population-based registry                  | IS&thrombolysis      | 4,155  | 1,354     | 32.6 | 71.9 (14.5) |                                     | 5,208  | 1,250     | 24   | 67 (13.2)   | 9 (5-16)                            |
| Tafreshi 2010 <sup>S46</sup>           | San Diego, United States            | 294        | Observational clinical cohort study        | IS&thrombolysis      | 148    | 51        | 34.5 | 72          |                                     | 146    | 27        | 18.5 | 68          |                                     |
| Tomita 2015 <sup>S47</sup>             | Japan                               | 355        | Observational clinical cohort study        | Cardioembolic stroke | 157    | 129       | 82   | 80 (8)      |                                     | 198    | 155       | 78   | 75 (9)      |                                     |
| Turaj 2009 <sup>S48</sup>              | Cracow, Poland                      | 1,488      | Observational clinical cohort study        | IS                   | 755    | 216       | 28.6 | 70.9 (13.7) |                                     | 733    | 116       | 15.8 | 66.2 (12.7) | 5 (3-10)                            |
| Vodonos 2017 <sup>S49</sup>            | Israel                              | 1,174      | Observational clinical cohort study        | IS                   | 509    | 148       | 35.1 | 73.8 (12.6) |                                     | 665    | 95        | 17.2 | 66.8 (12.7) |                                     |
| Zhang 2011 <sup>S50</sup>              | Guangzhou, China                    | 669        | Observational clinical cohort study        | IS                   | 220    | 24        | 10.9 | 39.5 (6.7)  |                                     | 449    | 20        | 4.5  | 39.2 (6.9)  | 5 (2-8)                             |
| Asdaghi 2016 <sup>S51</sup>            | Florida, Puerto, United States      | 51,317     | Population-based registry                  | IS                   | 25,381 | 4,721     | 18.6 | 73 (14.7)   |                                     | 25,936 | 4,072     | 15.7 | 68.8 (13.5) | 10 (6-16)                           |
| Buijs 2016 <sup>S52</sup>              | Groningen, the Netherlands          | 887        | Hospital registry data                     | IS&thrombolysis      | 397    | 104       | 26   | 72 (13.7)   |                                     | 490    | 75        | 15   | 67.4 (11.8) |                                     |
| Caso 2010 <sup>S53</sup>               | Italy                               | 1,136      | Observational clinical cohort study        | IS                   | 494    | 110       | 22   | 76 (12.9)   |                                     | 642    | 108       | 17   | 70 (13)     | 7.6 (6.3)                           |
| de Ridder 2017 <sup>S54</sup>          | The Netherlands                     | 5,515      | Population-based registry                  | IS                   | 2,778  | 144       | 19   | 74 (13)     |                                     | 2,737  | 153       | 17   | 70 (12)     | 5 (3-10)                            |
| Denti 2013 <sup>S55</sup>              | Parma, Italy                        | 1,993      | Observational clinical cohort study        | IS                   | 987    | 276       | 28   | 76.9 (12.7) | Scandinavian Stroke Scale 39 (2-56) | 1,006  | 177       | 17.5 | 71.4 (13.3) | Scandinavian Stroke Scale 48 (4-58) |
| Dhmoon 2017 <sup>S56</sup>             | Ontario, Canada                     | 2,549      | Population-based health care database      | IS&diabetes          | 11,902 | 2,501     | 21   | 75.6 (11.5) |                                     | 13,593 | 2,113     | 15.5 | 71.5 (11.3) |                                     |
| Kim 2013 <sup>S57</sup>                | Seoul, Republic of Korea            | 424        | Observational clinical cohort study        | IS&AF                | 176    |           | 41.5 |             |                                     | 248    |           | 58.5 |             | OR 2.19 (1.18-4.05)                 |
| Chiti 2015 <sup>S58</sup>              | Pisa, Italy                         | 164        | Observational clinical cohort study        | IS&AF                | 99     |           | 60.4 |             |                                     | 65     |           | 39.6 |             |                                     |
| Benbir 2007 <sup>S59</sup>             | Istanbul, Turkey                    | 106        | Observational clinical cohort study        | IS&AF                | 65     |           | 61.3 |             |                                     | 41     |           | 38.7 |             |                                     |

(continued)

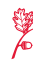

**Supplementary Table S2. (Continued)**

| Authors and year of publication    | Country and city               | Total case | Study type                          | Population                                  | Female |           |             |        | Male      |             |            |             |                                   |
|------------------------------------|--------------------------------|------------|-------------------------------------|---------------------------------------------|--------|-----------|-------------|--------|-----------|-------------|------------|-------------|-----------------------------------|
|                                    |                                |            |                                     |                                             | n      | No. of AF | %AF         | Age    | NIHSS     | n           | No. of AF  | %AF         | Age (years)                       |
| Batrova 2016 <sup>560</sup>        | Rochester, United States       | 55         | Observational clinical cohort study | IS&AF                                       | 19     | 35        | 35          | 36     | 65        | 36          | 65         |             |                                   |
| Allende 2016 <sup>561</sup>        | Salamanca, Spain               | 94         | Observational clinical cohort study | IS&AF                                       | 51     | 54.3      | 73.2 (14.5) | 43     | 45.7      | 43          | 45.7       | 68.1 (12.8) |                                   |
| Hornor 2008 <sup>562</sup>         | Austria                        | 1,3831     | Population-based registry           | IS                                          | 6,670  | 2,074.37  | 31.1        | 7,161  | 1,489.488 | 20.8        | 20.8       | 62.7        |                                   |
| Etherton 2017 <sup>563</sup>       | Boston, United States          | 319        | Observational clinical cohort study | IS                                          | 131    | 28        | 21.4        | 188    | 23        | 12.2        | 12.2       |             |                                   |
| Colello 2018 <sup>564</sup>        | South Carolina, United States  | 663        | Hospital registry data              | IS                                          | 354    | 96        | 27.11864    | 309    | 52        | 16.82848    | 16.82848   |             |                                   |
| Niewada 2005 <sup>565</sup>        | International                  | 1,7370     | Randomized controlled trial         | IS                                          | 8,003  | 1,673     | 20.9        | 9,367  | 1,321     | 14.1        | 14.1       | 69.3        |                                   |
| Perera 2016 <sup>566</sup>         | International                  | 2,144      | Global registry                     | Cardioembolic stroke of undetermined source | 969    | 295       | 30.44376    | 1,175  | 295       | 25.10638    | 25.10638   |             |                                   |
| Sakamoto 2014 <sup>567</sup>       | Japan                          | 244        | Hospital registry data              | IS&AF                                       | 124    | 50.81967  |             | 120    | 49.18033  | 49.18033    |            |             |                                   |
| Salihovic 2010 <sup>568</sup>      | Tuzia, Bosnia, and Herzegovina | 2,833      | Hospital registry data              | IS                                          | 1,484  | 329       | 22.2        | 1,349  | 190       | 14.1        | 14.1       | 65.7 (10.5) | Scandinavian Stroke Scale 34 (15) |
| Seo 2015 <sup>569</sup>            | Seoul, Republic of Korea       | 1,355      | Hospital registry data              | IS                                          | 521    | 162       | 31.09405    | 834    | 151       | 18.10552    | 18.10552   |             |                                   |
| Waldenhiort 2016 <sup>570</sup>    | Stockholm, Sweden              | 174        | Observational clinical cohort study | Cardioembolic stroke/TIA                    | 70     | 9         | 12.85714    | 104    | 6         | 5.769231    | 5.769231   |             |                                   |
| Yesilot-Bardas 2013 <sup>571</sup> | International                  | 575        | Population-based registry           | Cardioembolic stroke                        | 245    | 29        | 11.8        | 330    | 58        | 17.6        | 17.6       |             |                                   |
| Forster 2009 <sup>572</sup>        | Mannheim, Germany              | 237        | Observational clinical cohort study | IS&thrombolysis                             | 111    | 21        | 18.9        | 126    | 18        | 14.3        | 14.3       | 67.8 (11.9) | 11.3 (5.2)                        |
| Martin 2017 <sup>573</sup>         | Florida, United States         | 221        | Hospital registry data              | IS&AF                                       | 137    | 61.99095  | 78.5 (11.8) | 84     | 38.00905  | 38.00905    | 38.00905   | 71.6 (11.9) |                                   |
| Nezu 2016 <sup>574</sup>           | Japan                          | 1,2701     | Population-based registry           | IS&AF                                       | 5,653  | 44.50831  | 80.3 (9.4)  | 7,048  | 55.49169  | 73.7 (9.9)  | 55.49169   | 73.7 (9.9)  | 8 (3-18)                          |
| Lang 2017 <sup>575</sup>           | Austria                        | 6,3563     | Population-based registry           | IS                                          | 29,799 | 10,581    | 55.8        | 33,764 | 8,381     | 44.2        | 44.2       |             |                                   |
| Li 2015 <sup>576</sup>             | Tianjing, China                | 810        | Observational clinical cohort study | IS& aged >75 years                          | 383    | 70        | 18.3        | 488    | 75        | 15.4        | 15.4       |             |                                   |
| Min 2017 <sup>577</sup>            | Seoul, Republic of Korea       | 1,053      | Observational clinical cohort study | IS                                          | 477    | 40        | 8.4         | 576    | 41        | 7.1         | 7.1        | 65.7 (11.9) | 4.5 (2.7)                         |
| Jonsson 2015 <sup>578</sup>        | Lund, Sweden                   | 155        | Observational clinical cohort study | IS&AF                                       | 94     | 61        | 84.8 (8.1)  | 61     | 39        | 79.5 (8.7)  | 79.5 (8.7) |             |                                   |
| Cuadrado-Godia 2009 <sup>579</sup> | Barcelona, Spain               | 591        | Hospital registry data              | IS                                          | 273    | 109       | 39.9        | 318    | 62        | 19.5        | 19.5       |             |                                   |
| Zou 2017 <sup>580</sup>            | Hellongjiang, China            | 1,070      | Observational clinical cohort study | IS& aged >75 years                          | 406    | 36        | 8.9         | 536    | 44        | 8.2         | 8.2        |             |                                   |
| Ong 2017 <sup>581</sup>            | Taiwan                         | 4,278      | Observational clinical cohort study | IS                                          | 1,757  | 393       | 22.4        | 2,521  | 373       | 14.8        | 14.8       | 68.3 (11.8) | ≥16 13.1%                         |
| Hong 2017 <sup>582</sup>           | Tianjing, China                | 951        | Population-based registry           | IS&AF                                       | 433    | 45.53102  | 72.6 (8.7)  | 518    | 54.46898  | 70.2 (11.1) | 54.46898   | 70.2 (11.1) | 9 (14)                            |
| Yao 2012 <sup>583</sup>            | Shanghai, China                | 1,027      | Observational clinical cohort study | IS                                          | 406    | 30.856    | 7.6         | 621    | 24,219    | 3.9         | 3.9        | 65          |                                   |
| Boehme 2013 <sup>584</sup>         | LA, TX, United States          | 4,925      | Hospital registry data              | IS                                          | 2,372  | 430       | 18.2        | 2,605  | 345       | 13.3        | 13.3       | 63 (26-100) | 6 (0-40)                          |
| Putala 2009 <sup>585</sup>         | Helsinki, Finland              | 1,008      | Observational clinical cohort study | IS                                          | 380    | 12        | 3.2         | 628    | 30        | 4.8         | 4.8        |             |                                   |
| Park 2014 <sup>586</sup>           | Korea                          | 9,417      | Population-based registry           | IS                                          | 3,958  | 888       | 22.4        | 5,459  | 867       | 15.9        | 15.9       | 64.8 (12.5) | 5.9 (6.2)                         |

(continued)

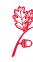

**Supplementary Table S2. (Continued)**

| Authors and year of publication                  | Country and city         | Total case | Study type                          | Population        | Female  |           |      |             | Male        |         |           |          |             |             |
|--------------------------------------------------|--------------------------|------------|-------------------------------------|-------------------|---------|-----------|------|-------------|-------------|---------|-----------|----------|-------------|-------------|
|                                                  |                          |            |                                     |                   | n       | No. of AF | %AF  | Age         | NIHSS       | n       | No. of AF | %AF      | Age (years) | NIHSS       |
| Andersen 2010 <sup>S87</sup>                     | Denmark                  | 4,0102     | Population-based registry           | IS                | 19,207  | 3369      | 17.5 |             |             | 20,895  | 2,742     | 13.1     |             |             |
| Lin 2015 <sup>S76</sup>                          | Taiwan                   | 360        | Observational clinical cohort study | IS&AF             | 140     | 38,88889  |      |             |             | 220     | 61,11111  |          |             |             |
| Oh 2009 <sup>S88</sup>                           | Seoul, Republic of Korea | 18,364     | Population-based registry           | IS                | 8,092   | 1,319     | 16.3 | 68.4 (11.8) | 6.0 (6.3)   | 10,542  | 1,386     | 13.1     | 63.4 (11.9) | 5.4 (5.8)   |
| Novello 1993 <sup>S89</sup>                      | Genova, Switzerland      | 516        | Observational clinical cohort study | IS                | 266     | 59        | 22.2 | 80.5 (11)   |             | 250     | 34        | 13.6     | 75.7 (9.3)  |             |
| Simpson 2005 <sup>S90</sup>                      | Scotland, United Kingdom | 1,120      | Population-based registry           | IS&AF             | 567     | 50,625    |      |             |             | 553     | 49,375    |          |             |             |
| Reeves 2009 <sup>S91</sup>                       | United States            | 383,318    | Population-based registry           | IS                | 201,706 | 40,807    | 20.4 | 73.3        |             | 181,612 | 28,167    | 15.6     | 68.5        |             |
| Sjolander 2012 <sup>S92</sup>                    | Sweden                   | 18,175     | Population-based registry           | IS                | 8,923   | 2,553     | 28.6 | 77.8        |             | 9,252   | 2,373     | 25.6     | 73.4        |             |
| Yu 2015 <sup>S93</sup>                           | Tianjing, China          | 1,484      | Observational clinical cohort study | IS&aged >75 years | 636     | 120       | 18.9 |             | 7.75 (0-37) | 848     | 137       | 16.2     |             | 6.35 (0-36) |
| Ghandehari 2008 <sup>S94</sup>                   | Canada and Iran          | 200        | Observational clinical cohort study | IS                | 108     | 20        | 18.5 |             |             | 92      | 5         | 5.45     |             |             |
| Morin-Martin 2003 <sup>S95</sup>                 | Spain                    | 10,892     | Population-based registry           | IS                | 4,248   | 909       | 21.4 | 71          |             | 6,644   | 751       | 11.3     | 69          |             |
| Tiseo 2017 <sup>S96</sup>                        | L'Aquila, Italy          | 285        | Population-based registry           | IS&AF             | 182     | 63,85965  |      |             |             | 103     | 36,14035  |          |             |             |
| Towfighi 2013 <sup>S97</sup>                     | United States            | 605,960    | Nationwide inpatient sample         | IS&thrombolysis   | 332,225 | 73,089.5  | 22   | 76.5        |             | 273,735 | 48,724.83 | 17.8     | 71.2        |             |
| Gattringer 2014 <sup>S98</sup>                   | Austria                  | 47,209     | Population-based registry           | IS                | 22,329  | 7,190     | 32.3 | 77.9        | 4 (2-11)    | 24,880  | 5,623     | 22.7     | 70.3        | 3 (1-7)     |
| Nathanson 2014 <sup>S99</sup>                    | Stockholm, Sweden        | 355        | Observational clinical cohort study | IS&thrombolysis   | 162     | 44        | 27.2 | 76 (67-84)  |             | 193     | 29        | 15       | 69 (61-76)  |             |
| Bae 2018 <sup>S100</sup>                         | Korea                    | 1,350      | Population-based registry           | IS&AF             | 621     | 46        | 46   |             |             | 729     | 54        | 54       |             |             |
| Barreira 2018 <sup>S101</sup>                    | United States            | 1,364      | Observational clinical cohort study | IS                | 636     | 246,768   | 38.8 | 67.4 (15.4) |             | 728     | 227,864   | 31.3     | 62.5 (13.8) |             |
| Burzhunova 2018 <sup>S102</sup>                  | Russian                  | 140        | Observational clinical cohort study | IS&AF             | 71      | 51        | 51   | 74 (66-79)  |             | 69      | 49        | 49       | 67 (63-76)  |             |
| Chou 2018 <sup>S103</sup>                        | Taiwan                   | 907        | Observational clinical cohort study | IS&AF             | 422     | 46.5      |      |             |             | 485     | 53.5      |          |             |             |
| Christensen and Christensen 2018 <sup>S104</sup> | Denmark                  | 1,178      | Observational clinical cohort study | IS                | 892     | 188       | 21.1 | 75          |             | 286     | 43        | 15.1     | 69          |             |
| Hung 2018 <sup>S105</sup>                        | Taiwan                   | 403        | Observational clinical cohort study | IS                | 170     | 51        | 21.9 |             |             | 233     | 45        | 26.5     |             |             |
| Keller 2018 <sup>S106</sup>                      | Germany                  | 292,396    | Population-based registry           | IS                | 141,801 | 48,495.94 | 34.2 |             |             | 150,595 | 39,907.68 | 26.5     |             |             |
| Radivojevic 2018 <sup>S107</sup>                 | Serbia                   | 226        | Observational clinical cohort study | IS                | 87      | 34.8      | 40   | 67.5        |             | 139     | 31.97     | 23       | 59.5        |             |
| McGrath 2013 <sup>S108</sup>                     | Canada                   | 10,528     | Population-based registry           | IS                | 5,063   | 1,542     | 30.5 |             |             | 5,465   | 1,212     | 22.17749 |             |             |
| Antonenko 2017 <sup>S109</sup>                   | Asia and Europe          | 1,029      | Observational clinical cohort study | IS&AF             | 561     |           |      | 75.1 (9)    | 8.1 (7.5)   | 468     |           |          | 77.2 (9.7)  | 9.2 (6.9)   |

<sup>a</sup>Only 3,530 people with ischemic stroke were included in the analyses after excluding 64 cases without ECG evaluation out of a total of 3,594 cases.

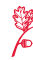

**Supplementary Table S3. Stroke Severity by Sex in the Included Studies**

| Authors and year of publication |                                         | Women       | Men         |
|---------------------------------|-----------------------------------------|-------------|-------------|
| Kim 2015                        | Moderate to severe neurological deficit | 38.2%       | 37.5%       |
| Martin 2017                     | CHADS2, mean (SD)                       | 2.54 (1.12) | 2.34 (1.41) |
|                                 | CHA2DS2-VASC, mean (SD)                 | 4.71 (1.44) | 3.45 (1.83) |
| Nezu 2016                       | mRS4–6                                  | 72.3%       | 46%         |
|                                 | CHADS2, median (IQR)                    | 2 (1–3)     | 2 (1–3)     |
|                                 | CHA2DS2-VASC, median (IQR)              | 4 (3–5)     | 3 (2–4)     |
|                                 | NIHSS, median (IQR)                     | 14 (5–22)   | 8 (3–18)    |
| Lang 2017                       | NIHSS, median (IQR)                     | 9 (4–17)    | 6 (3–13)    |
|                                 | prestroke mRS0–1                        | 62.4%       | 76.7%       |
| Hong 2017                       | NIHSS, mean (SD)                        | 13 (15)     | 9 (14)      |
| Antonenko 2017                  | NIHSS, mean (SD)                        | 8.1 (7.5)   | 9.2 (6.9)   |

IQR, interquartile range; NIHSS, National Institutes of Health Stroke Scale; SD, standard deviation.

**Supplementary Table S4. Proportion of Antiplatelet Therapy by Sex in the Included Studies**

| Authors and year of publication | Women        | Men            |
|---------------------------------|--------------|----------------|
| Tentschert 2004                 | 112 (60%)    | 76 (40%)       |
| Nakamura 2016                   | 154 (51.7%)  | 247 (60.8%)    |
| Martin 2017                     | 16 (10.2%)   | 16 (19.1%)     |
| Nezu 2016                       | 1,356 (24%)  | 1,980 (28.1%)  |
| Hong 2017                       | 333 (76.9%)  | 396 (76.4%)    |
| Li 2015                         | 38 (27%)     | 88 (40%)       |
| Simpson 2005                    | 265 (46.7%)  | 321 (58.1%)    |
| Reeves 2009                     | 21,927 (88%) | 17,159 (89.7%) |
| Sjolander 2012                  | 352 (13.9%)  | 458 (19.6%)    |
| Eriksson 2008                   | 434 (48%)    | 646 (50.6%)    |
| Antonenko 2017                  | 141 (25.5%)  | 148 (31.9%)    |



**Supplementary Table S5. Comorbidities by Sex in the Included Studies**

|                                             | Authors and year of publication | Women         | Men           |
|---------------------------------------------|---------------------------------|---------------|---------------|
| Hypertension                                | Martin 2017                     | 124 (90.5%)   | 65 (77.4%)    |
|                                             | Nezu 2016                       | 3,803 (67.3%) | 4,528 (64.3%) |
|                                             | Lang 2017                       | 9,166 (86.8%) | 7,132 (85.1%) |
|                                             | Hong 2017                       | 299 (69.1%)   | 317 (61.2%)   |
| Hyperlipidemia                              | Antonenko 2017                  | 457 (82.3%)   | 364 (78.3%)   |
|                                             | Martin 2017                     | 55 (40.2%)    | 33 (39.3%)    |
|                                             | Nezu 2016                       | 1,183 (20.9%) | 1,289 (18.3%) |
|                                             | Lang 2017                       | 4,956 (46.8%) | 4,420 (52.7%) |
|                                             | Hong 2017                       | 129 (29.8%)   | 107 (20.7%)   |
| Diabetes                                    | Antonenko 2017                  | 161 (29.2%)   | 171 (36.9%)   |
|                                             | Martin 2017                     | 39 (28.5%)    | 34 (40.5%)    |
|                                             | Nezu 2016                       | 989 (17.5%)   | 1,559 (22.1%) |
|                                             | Lang 2017                       | 2,759 (26.1%) | 2,356 (28.1%) |
|                                             | Hong 2017                       | 114 (26.3%)   | 124 (23.9%)   |
| History of stroke/transient ischemic attack | Antonenko 2017                  | 144 (25.9%)   | 120 (25.8%)   |
|                                             | Martin 2017                     | 36 (26.5%)    | 22 (26.2%)    |
|                                             | Nezu 2016                       | 1,683 (29.8%) | 2,237 (31.7%) |
|                                             | Lang 2017                       | 2,930 (27.7%) | 2,386 (28.5%) |
| Congestive heart failure                    | Antonenko 2017                  | 138 (25%)     | 127 (27.4%)   |
|                                             | Martin 2017                     | 17 (12.4%)    | 16 (19.1%)    |
|                                             | Nezu 2016                       | 375 (6.6%)    | 326 (4.6%)    |
|                                             | Antonenko 2017                  | 99 (17.7%)    | 94 (20.2%)    |
| History of myocardial infarction            | Lang 2017                       | 1,061 (10%)   | 1,265 (15.1%) |
|                                             | Antonenko 2017                  | 72 (13%)      | 94 (20.2%)    |

**Supplementary Table S6. Comorbidities by Sex in the Included Studies**

| Authors and year of publication | Outcome              | OR (95% CI)/proportion    |
|---------------------------------|----------------------|---------------------------|
| Tentschert 2004                 | Vascular events      | W vs. M 1.20 (0.80–1.90)  |
| Kongbunkiat 2015                | Hospital mortality   | W vs. M 1.28 (1.18–1.39)  |
| Giralt-Steinhauer 2012          | mRS3–6 at day 90     | W vs. M (57% vs. 46%)     |
| Jonsson 2015                    | Hospital mortality   | W vs. M (27% vs. 17%)     |
|                                 | 1-year mortality     | W vs. M (44% vs. 40%)     |
|                                 | 5-year mortality     | W vs. M (76% vs. 73%)     |
| Hong 2017                       | 3-month dependency   | W vs. M 1.09 (0.80–1.48)  |
|                                 | 12-month dependency  | W vs. M 1.12 (0.82–1.51)  |
|                                 | 36-month dependency  | W vs. M 1.64 (1.02–2.64)  |
|                                 | 36-month recurrence  | W vs. M 2.03 (1.28–3.20)  |
| Antonenko 2017                  | Mortality at 90 days | W vs. M (11.6% vs. 10.1%) |
|                                 | mRS3–6 at day 90     | W vs. M (57.7% vs. 41.1%) |

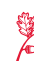

**Supplementary Table S7. Presence of Atrial Fibrillation Among People with Ischemic Stroke**

| Study                                 | Study year | Total              |                 | Men<br>AF, n/N (%) | Women<br>AF, n/N (%) |
|---------------------------------------|------------|--------------------|-----------------|--------------------|----------------------|
|                                       |            | Baseline N         | Mean age, years |                    |                      |
| Joinville, Brazil <sup>S110</sup>     | 09–14      | 1,555              | 64.5            | 36/811 (4.4)       | 46/744 (6.2)         |
| Melbourne, Australia <sup>S111</sup>  | 96–99      | 915                | 74.7            | 99/431 (23.0)      | 131/484 (27.1)       |
| Arcadia, Greece <sup>S112</sup>       | 93–95      | 375                | 75.1            | 73/212 (34.4)      | 69/163 (42.3)        |
| Perth, Australia <sup>S113</sup>      | 99–00      | 135                | 76.3            | 15/65 (23.1)       | 17/70 (24.3)         |
| Orebro, Sweden <sup>S114</sup>        | 98–00      | 274                | 75.3            | 26/125 (20.8)      | 39/149 (26.2)        |
| Porto, Portugal <sup>S115</sup>       | 02–03      | 524                | 71.9            | 30/219 (13.7)      | 60/305 (19.7)        |
| Auckland, New Zealand <sup>S116</sup> | 09–14      | 1,015              | 71.8            | 103/499 (20.6)     | 128/516 (24.8)       |
| L'Aquila, Italy <sup>S8</sup>         | 94–98      | 3,530 <sup>a</sup> | 78.8            | 340/1,676 (20.3)   | 529/1,854 (28.5)     |
| Tartu, Estonia <sup>S117</sup>        | 93–95      | 322                | 72.2            | 40/137 (29.2)      | 81/195 (41.5)        |
| Total                                 |            | 8,645              | 72.6            | 762/4,175 (18.3)   | 1,100/4,480 (24.6)   |

<sup>a</sup>Only 3,530 people with ischemic stroke were included in the analyses after excluding 64 cases without ECG evaluation out of a total of 3,594 cases.





**Supplementary Table S8. Characteristics and Long-Term Outcomes of People with Ischemic Stroke and Atrial Fibrillation by Sex in the Joinville, Melbourne, Arcadia, Perth and Orebro Studies**

| Study                                  | Joinville (N=82)  |                   | Melbourne (N=230)  |                   | Arcadia (N=142) |              | Perth (N=32)    |                  | Orebro (N=65)     |                   |
|----------------------------------------|-------------------|-------------------|--------------------|-------------------|-----------------|--------------|-----------------|------------------|-------------------|-------------------|
|                                        | Men, n (%)        | Women, n (%)      | Men, n (%)         | Women, n (%)      | Men, n (%)      | Women, n (%) | Men, n (%)      | Women, n (%)     | Men, n (%)        | Women, n (%)      |
| <b>Sociodemographic</b>                |                   |                   |                    |                   |                 |              |                 |                  |                   |                   |
| Mean (SD) age                          | <b>69.4 (7.8)</b> | <b>77.8 (9.6)</b> | <b>77.8 (10.0)</b> | <b>82.3 (8.0)</b> | 78.4 (9.5)      | 78.0 (8.9)   | 79.5 (9.7)      | 81.8 (9.3)       | <b>77.2 (9.1)</b> | <b>82.3 (6.4)</b> |
| Marital status                         |                   |                   |                    |                   |                 |              |                 |                  |                   |                   |
| Single/widowed                         | —                 | —                 | —                  | —                 | —               | —            | 8 (53.3)        | 14 (82.4)        | <b>9 (34.6)</b>   | <b>27 (69.2)</b>  |
| Married                                | 2 (5.6)           | 0 (0)             | <b>49 (46.5)</b>   | <b>64 (48.9)</b>  | —               | —            | 6 (40.0)        | 3 (17.7)         | <b>17 (65.4)</b>  | <b>11 (28.2)</b>  |
| Unknown                                | 0 (0)             | 0 (0)             | <b>4 (1)</b>       | <b>2 (1.5)</b>    | —               | —            | 1 (6.7)         | 0 (0)            | <b>0 (0)</b>      | <b>1 (2.6)</b>    |
| <b>Education level</b>                 |                   |                   |                    |                   |                 |              |                 |                  |                   |                   |
| ≤Grade 12                              | 34 (91.4)         | 46 (100.0)        | <b>46 (946.5)</b>  | <b>65 (49.6)</b>  | —               | —            | —               | —                | —                 | —                 |
| >Grade 12                              | 2 (5.6)           | 0 (0)             | <b>49 (46.5)</b>   | <b>64 (48.9)</b>  | —               | —            | —               | —                | —                 | —                 |
| Unknown                                | 0 (0)             | 0 (0)             | <b>4 (1)</b>       | <b>2 (1.5)</b>    | —               | —            | —               | —                | —                 | —                 |
| <b>Social class</b>                    |                   |                   |                    |                   |                 |              |                 |                  |                   |                   |
| Professional                           | —                 | —                 | <b>39 (39.4)</b>   | <b>36 (27.5)</b>  | —               | —            | <b>3 (20.0)</b> | <b>0 (0)</b>     | —                 | —                 |
| Nonmanual                              | —                 | —                 | <b>7 (7.1)</b>     | <b>16 (12.2)</b>  | —               | —            | <b>0 (0)</b>    | <b>4 (23.5)</b>  | —                 | —                 |
| Manual                                 | —                 | —                 | <b>48 (48.5)</b>   | <b>46 (35.1)</b>  | —               | —            | <b>5 (33.3)</b> | <b>3 (17.7)</b>  | —                 | —                 |
| Unknown                                | —                 | —                 | <b>5 (5.1)</b>     | <b>33 (25.2)</b>  | —               | —            | <b>7 (46.7)</b> | <b>10 (58.8)</b> | —                 | —                 |
| <b>Prestroke health</b>                |                   |                   |                    |                   |                 |              |                 |                  |                   |                   |
| In an institution                      | —                 | —                 | —                  | —                 | —               | —            | —               | —                | —                 | —                 |
| Yes                                    | —                 | —                 | 13 (13.1)          | 22 (16.8)         | —               | —            | 2 (13.3)        | 1 (5.9)          | 1 (3.9)           | 5 (12.8)          |
| No                                     | —                 | —                 | 85 (85.9)          | 108 (82.4)        | —               | —            | 13 (86.7)       | 15 (88.2)        | 25 (96.2)         | 34 (87.2)         |
| Unknown                                | —                 | —                 | 1 (1.0)            | 1 (0.8)           | —               | —            | 0 (0)           | 1 (5.9)          | 0 (0)             | 0 (0)             |
| <b>Modified Rankin score</b>           |                   |                   |                    |                   |                 |              |                 |                  |                   |                   |
| 0–2                                    | —                 | —                 | —                  | —                 | 73 (100.0)      | 68 (95.6)    | 11 (73.3)       | 8 (47.1)         | —                 | —                 |
| 3–5                                    | —                 | —                 | —                  | —                 | 0 (0)           | 1 (1.5)      | 3 (20.0)        | 6 (35.3)         | —                 | —                 |
| Unknown                                | —                 | —                 | —                  | —                 | 0 (0)           | 0 (0)        | 1 (6.7)         | 3 (17.7)         | —                 | —                 |
| <b>BI score</b>                        |                   |                   |                    |                   |                 |              |                 |                  |                   |                   |
| 20                                     | —                 | —                 | 20 (20.2)          | 29 (22.1)         | —               | —            | 11 (73.3)       | 8 (47.1)         | 17 (65.4)         | 19 (48.7)         |
| <20                                    | —                 | —                 | 46 (46.5)          | 56 (42.8)         | —               | —            | 3 (20.0)        | 6 (35.3)         | 0 (0)             | 1 (2.6)           |
| Unknown                                | —                 | —                 | 33 (32.3)          | 46 (35.1)         | —               | —            | 1 (6.7)         | 3 (17.7)         | 9 (34.6)          | 19 (48.7)         |
| <b>Mean (SD) modified Rankin score</b> | —                 | —                 | —                  | —                 | 0.4 (0.6)       | 0.6 (0.8)    | 1.4 (1.5)       | 1.5 (1.5)        | —                 | —                 |
| <b>Mean (SD) BI</b>                    | —                 | —                 | 18.2 (4.2)         | 18.4 (3.6)        | —               | —            | 18.5 (3.0)      | 19.1 (1.3)       | 20.0 (0)          | 19.9 (0.22)       |
| <b>Medical history</b>                 |                   |                   |                    |                   |                 |              |                 |                  |                   |                   |
| Hypertension                           |                   |                   |                    |                   |                 |              |                 |                  |                   |                   |
| Yes                                    | 30 (83.3)         | 35 (76.1)         | 61 (61.6)          | 82 (62.6)         | 58 (79.5)       | 59 (85.5)    | 7 (46.7)        | 10 (58.8)        | 7 (26.9)          | 16 (41.0)         |
| No                                     | 6 (16.7)          | 11 (23.9)         | 37 (37.4)          | 47 (35.9)         | 15 (20.6)       | 10 (14.5)    | 7 (46.7)        | 7 (41.2)         | 17 (65.4)         | 22 (56.4)         |
| Unknown                                | 0 (0)             | 0 (0)             | 1 (1.0)            | 2 (1.5)           | 0 (0)           | 0 (0)        | 1 (6.7)         | 0 (0)            | 2 (7.7)           | 1 (2.6)           |
| <b>Ischemic heart disease</b>          |                   |                   |                    |                   |                 |              |                 |                  |                   |                   |
| Yes                                    | 6 (16.7)          | 4 (8.7)           | 26 (26.3)          | 23 (17.6)         | 15 (20.6)       | 15 (21.7)    | 5 (33.3)        | 3 (17.7)         | 2 (7.7)           | 7 (18.0)          |
| No                                     | 30 (83.3)         | 42 (91.3)         | 73 (73.7)          | 107 (81.7)        | 58 (79.5)       | 54 (78.3)    | 10 (66.7)       | 14 (82.4)        | 24 (92.3)         | 32 (82.1)         |
| Unknown                                | 0 (0)             | 0 (0)             | 0 (0)              | 1 (0.8)           | 0 (0)           | 0 (0)        | 0 (0)           | 0 (0)            | 0 (0)             | 0 (0)             |
| <b>Peripheral vascular disease</b>     |                   |                   |                    |                   |                 |              |                 |                  |                   |                   |
| Yes                                    | —                 | —                 | <b>24 (24.2)</b>   | <b>8 (6.1)</b>    | 3 (4.1)         | 5 (7.3)      | —               | —                | 9 (34.6)          | 18 (46.2)         |
| No                                     | —                 | —                 | <b>74 (74.8)</b>   | <b>121 (92.4)</b> | 70 (95.9)       | 64 (92.8)    | —               | —                | 17 (65.4)         | 21 (53.9)         |
| Unknown                                | —                 | —                 | <b>1 (1.0)</b>     | <b>2 (1.5)</b>    | 0 (0)           | 0 (0)        | —               | —                | 0 (0)             | 1 (0.7)           |

(continued)

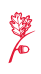

Supplementary Table S8. (Continued)

| Study                      | Joinville (N = 82) |                 | Melbourne (N = 230) |                | Arcadia (N = 142) |               | Perth (N = 32) |              | Orebro (N = 65) |                |
|----------------------------|--------------------|-----------------|---------------------|----------------|-------------------|---------------|----------------|--------------|-----------------|----------------|
|                            | Men, n (%)         | Women, n (%)    | Men, n (%)          | Women, n (%)   | Men, n (%)        | Women, n (%)  | Men, n (%)     | Women, n (%) | Men, n (%)      | Women, n (%)   |
| Transient ischemic attack  |                    |                 |                     |                |                   |               |                |              |                 |                |
| Yes                        | 0 (0)              | 1 (2.2)         | 10 (10.1)           | 12 (9.2)       | 20 (27.4)         | 13 (18.8)     | 6 (40.0)       | 0 (0)        | 7 (26.9)        | 5 (12.8)       |
| No                         | 36 (100)           | 45 (97.8)       | 87 (87.9)           | 119 (90.8)     | 53 (72.6)         | 56 (81.2)     | 7 (46.7)       | 15 (88.2)    | 19 (73.1)       | 34 (87.2)      |
| Unknown                    | 0 (0)              | 0 (0)           | 2 (2.0)             | 0 (0)          | 0 (0)             | 0 (0)         | 2 (13.3)       | 2 (11.8)     | 0 (0)           | 0 (0)          |
| Diabetes                   |                    |                 |                     |                |                   |               |                |              |                 |                |
| Yes                        | —                  | —               | 18 (18.2)           | 20 (15.3)      | 21 (28.8)         | 24 (34.8)     | 5 (33.3)       | 2 (11.8)     | 5 (19.2)        | 4 (10.3)       |
| No                         | —                  | —               | 81 (81.8)           | 111 (84.7)     | 52 (71.2)         | 45 (65.2)     | 10 (66.7)      | 15 (88.2)    | 20 (76.9)       | 34 (87.2)      |
| Unknown                    | —                  | —               | 0 (0.0)             | 0 (0)          | 0 (0)             | 0 (0)         | 0 (0)          | 0 (0)        | 1 (3.9)         | 1 (2.6)        |
| Dementia                   |                    |                 |                     |                |                   |               |                |              |                 |                |
| Yes                        | —                  | —               | 9 (9.1)             | 17 (13.0)      | —                 | —             | —              | —            | 1 (3.9)         | 6 (15.4)       |
| No                         | —                  | —               | 68 (68.7)           | 83 (63.4)      | —                 | —             | —              | —            | 25 (96.2)       | 33 (84.6)      |
| Unknown                    | —                  | —               | 22 (22.2)           | 31 (23.7)      | —                 | —             | —              | —            | 0 (0)           | 0 (0.0)        |
| Smoking                    |                    |                 |                     |                |                   |               |                |              |                 |                |
| Never                      | 7 (19.4)           | 36 (78.3)       | 29 (29.3)           | 70 (53.4)      | 53 (72.6)         | 68 (98.6)     | 2 (13.3)       | 11 (64.7)    | 18 (69.2)       | 33 (84.6)      |
| Current                    | 24 (66.7)          | 9 (19.6)        | 54 (54.6)           | 35 (26.7)      | 20 (27.4)         | 1 (1.5)       | 8 (53.3)       | 1 (5.9)      | 5 (19.2)        | 6 (15.4)       |
| Former                     | 5 (13.9)           | 1 (2.2)         | 8 (8.1)             | 6 (4.6)        | —                 | —             | 0 (0)          | 1 (5.9)      | —               | —              |
| Unknown                    | 0 (0)              | 0 (0)           | 8 (8.1)             | 20 (15.3)      | —                 | —             | 5 (33.3)       | 4 (23.5)     | 3 (11.5)        | 0 (0)          |
| Alcohol use                |                    |                 |                     |                |                   |               |                |              |                 |                |
| Nondrinkers                | 23 (63.9)          | 41 (89.1)       | 10 (10.1)           | 57 (43.5)      | 58 (79.5)         | 67 (97.1)     | 4 (26.7)       | 8 (47.1)     | —               | —              |
| Not heavy drinkers         | 9 (25.0)           | 5 (10.9)        | 59 (59.6)           | 48 (36.6)      | —                 | —             | 0 (0)          | 3 (17.7)     | —               | —              |
| Heavy drinkers             | 4 (11.1)           | 0 (0)           | 3 (3.0)             | 1 (0.8)        | 15 (20.6)         | 2 (2.9)       | 3 (20.0)       | 1 (5.9)      | —               | —              |
| Ex-drinkers                | —                  | —               | 9 (9.1)             | 1 (0.8)        | —                 | —             | 0 (0)          | 0 (0)        | —               | —              |
| Unknown                    | 0 (0)              | 0 (0)           | 18 (18.2)           | 24 (18.3)      | —                 | —             | 8 (53.3)       | 5 (29.4)     | —               | —              |
| Stroke-related factors     |                    |                 |                     |                |                   |               |                |              |                 |                |
| Hospital admission         |                    |                 |                     |                |                   |               |                |              |                 |                |
| Yes                        | 36 (100)           | 46 (100)        | 97 (98.0)           | 129 (98.5)     | 72 (98.6)         | 67 (97.1)     | 12 (80.0)      | 11 (64.7)    | 25 (96.2)       | 38 (97.4)      |
| No                         | 0 (0)              | 0 (0)           | 2 (2.0)             | 2 (1.5)        | 1 (1.4)           | 2 (2.9)       | 3 (20.0)       | 6 (35.3)     | 1 (3.9)         | 1 (2.6)        |
| Time to arrive at hospital |                    |                 |                     |                |                   |               |                |              |                 |                |
| ≤4.5 hours                 | 13 (36.1)          | 29 (63.0)       | 22 (22.2)           | 30 (22.9)      | —                 | —             | 2 (13.3)       | 3 (17.7)     | —               | —              |
| >4.5–24 hours              | 14 (38.9)          | 8 (17.4)        | 4 (4.0)             | 12 (9.2)       | —                 | —             | 0 (0)          | 1 (5.9)      | —               | —              |
| >24 hours                  | 7 (19.4)           | 5 (10.9)        | 5 (5.1)             | 4 (3.1)        | —                 | —             | 0 (0)          | 3 (17.7)     | —               | —              |
| Unknown                    | 2 (5.6)            | 4 (8.7)         | 68 (68.7)           | 85 (64.9)      | —                 | —             | 13 (96.7)      | 10 (58.8)    | —               | —              |
| Stroke severity            |                    |                 |                     |                |                   |               |                |              |                 |                |
| Mean (SD) NIHSS            | 7.1 (7.7)          | 11.8 (8.2)      | 10.0 (8.6)          | 10.1 (8.5)     | —                 | —             | 9.4 (7.7)      | 6.9 (7.4)    | 7.2 (6.7)       | 11.4 (9.6)     |
| Median (IQR) NIHSS         | 4.0 (2.0–9.0)      | 11.0 (4.0–18.0) | 8.0 (3.0–13.0)      | 8.0 (3.0–16.0) | —                 | —             | 6.5 (4.5–13.5) | 4.0 (0–13.0) | 6.0 (3.0–9.0)   | 8.0 (3.0–19.0) |
| Mean (SD) GCS, reversed    | —                  | —               | —                   | —              | 4.6 (2.8)         | 5.0 (3.3)     | —              | —            | —               | —              |
| Mean (IQR) GCS, reversed   | —                  | —               | —                   | —              | 3.0 (3.0–4.0)     | 3.0 (3.0–4.0) | —              | —            | —               | —              |
| Loss of consciousness      |                    |                 |                     |                |                   |               |                |              |                 |                |
| Yes                        | —                  | —               | 24 (24.2)           | 34 (26.0)      | 5 (6.9)           | 10 (14.5)     | —              | —            | —               | —              |
| No                         | —                  | —               | 53 (53.5)           | 65 (49.6)      | 67 (91.8)         | 57 (82.6)     | —              | —            | —               | —              |
| Unknown                    | —                  | —               | 22 (22.2)           | 32 (24.4)      | 1 (1.4)           | 2 (2.9)       | —              | —            | —               | —              |

(continued)



**Supplementary Table S8. (Continued)**

| Study                                       | Joinville (N=82) |                   | Melbourne (N=230) |                  | Arcadia (N=142) |              | Perth (N=32) |              | Orebro (N=65) |              |
|---------------------------------------------|------------------|-------------------|-------------------|------------------|-----------------|--------------|--------------|--------------|---------------|--------------|
|                                             | Men, n (%)       | Women, n (%)      | Men, n (%)        | Women, n (%)     | Men, n (%)      | Women, n (%) | Men, n (%)   | Women, n (%) | Men, n (%)    | Women, n (%) |
| Medications at discharge                    |                  |                   |                   |                  |                 |              |              |              |               |              |
| Antiplatelet agents                         |                  |                   |                   |                  |                 |              |              |              |               |              |
| Yes                                         | —                | —                 | <b>21 (21.2)</b>  | <b>45 (34.4)</b> | —               | —            | —            | —            | —             | —            |
| No                                          | —                | —                 | <b>78 (78.8)</b>  | <b>86 (65.7)</b> | —               | —            | —            | —            | —             | —            |
| Unknown                                     | —                | —                 | <b>0 (0)</b>      | <b>0 (0)</b>     | —               | —            | —            | —            | —             | —            |
| Anticoagulant agent                         |                  |                   |                   |                  |                 |              |              |              |               |              |
| Yes                                         | —                | —                 | 30 (30.3)         | 36 (27.5)        | —               | —            | 6 (40.0)     | 3 (17.7)     | —             | —            |
| No                                          | —                | —                 | 69 (69.7)         | 95 (72.5)        | —               | —            | 6 (40.0)     | 8 (47.1)     | —             | —            |
| Unknown                                     | —                | —                 | 0 (0)             | 0 (0)            | —               | —            | 3 (20.0)     | 6 (35.3)     | —             | —            |
| Outcome                                     |                  |                   |                   |                  |                 |              |              |              |               |              |
| 1-year mortality                            |                  |                   |                   |                  |                 |              |              |              |               |              |
| Yes                                         | <b>6 (16.7)</b>  | <b>20 (943.5)</b> | 42 (42.4)         | 55 (42.0)        | 32 (43.8)       | 28 (40.6)    | 5 (33.3)     | 6 (35.3)     | 9 (34.6)      | 19 (48.7)    |
| No                                          | <b>30 (83.3)</b> | <b>26 (56.5)</b>  | 57 (57.6)         | 76 (58.0)        | 40 (54.8)       | 39 (56.5)    | 10 (66.7)    | 11 (64.7)    | 17 (65.4)     | 20 (51.3)    |
| Missing                                     | <b>0 (0)</b>     | <b>0 (0)</b>      | 0 (0)             | 0 (0)            | 1 (1.4)         | 2 (2.9)      | 0 (0)        | 0 (0)        | 0 (0)         | 0 (0)        |
| 5-year mortality                            |                  |                   |                   |                  |                 |              |              |              |               |              |
| Yes                                         | —                | —                 | 63 (63.6)         | 92 (70.2)        | —               | —            | —            | —            | 13 (50.0)     | 28 (71.8)    |
| No                                          | —                | —                 | 36 (36.4)         | 39 (29.8)        | —               | —            | —            | —            | 13 (50.0)     | 11 (28.2)    |
| Missing                                     | —                | —                 | 0 (0)             | 0 (0)            | —               | —            | —            | —            | 0 (0)         | 0 (0)        |
| Poor 1-year functional outcome <sup>a</sup> |                  |                   |                   |                  |                 |              |              |              |               |              |
| Yes (mRS >2/BI <20)                         | <b>3 (10.0)</b>  | <b>8 (30.8)</b>   | 19 (33.3)         | 28 (36.4)        | 13 (32.5)       | 17 (43.6)    | —            | —            | 6 (35.3)      | 10 (50.0)    |
| No (mRS ≤2/BI =20)                          | <b>26 (86.7)</b> | <b>14 (53.9)</b>  | 19 (33.3)         | 13 (16.9)        | 26 (65.0)       | 20 (51.3)    | —            | —            | 11 (64.7)     | 10 (50.0)    |
| Unknown                                     | <b>1 (3.3)</b>   | <b>4 (15.4)</b>   | 19 (33.3)         | 36 (46.8)        | 1 (2.5)         | 2 (5.1)      | —            | —            | 0 (0)         | 0 (0)        |
| Poor 5-year functional outcome <sup>a</sup> |                  |                   |                   |                  |                 |              |              |              |               |              |
| Yes (mRS >2/BI <20)                         | —                | —                 | 15 (41.7)         | 19 (48.7)        | —               | —            | —            | —            | —             | —            |
| No (mRS ≤2/BI =20)                          | —                | —                 | 14 (38.9)         | 14 (35.9)        | —               | —            | —            | —            | —             | —            |
| Unknown                                     | —                | —                 | 7 (19.4)          | 6 (15.4)         | —               | —            | —            | —            | —             | —            |

Bold denotes statistically significant results.

<sup>a</sup>Among survivors only.

GCS, Glasgow Coma Scale.

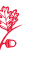

**Supplementary Table S9. Characteristics and Long-Term Outcomes of People with Ischemic Stroke and Atrial Fibrillation by Sex in the Porto, Auckland, L'Aquila, and Tartu Studies**

| Study                           | Porto (N=90)       |                   | Auckland (N=231) |                  | L'Aquila (N=869)  |                   | Tartu (N=121)     |                   |
|---------------------------------|--------------------|-------------------|------------------|------------------|-------------------|-------------------|-------------------|-------------------|
|                                 | Men, n (%)         | Women, n (%)      | Men, n (%)       | Women, n (%)     | Men, n (%)        | Women, n (%)      | Men, n (%)        | Women, n (%)      |
| Sociodemographic                |                    |                   |                  |                  |                   |                   |                   |                   |
| Mean (SD) Age                   | <b>74.6 (11.0)</b> | <b>78.6 (7.7)</b> | 75.5 (9.8)       | 77.7 (12.4)      | <b>77.1 (9.1)</b> | <b>79.9 (8.5)</b> | <b>73.5 (7.7)</b> | <b>77.1 (8.3)</b> |
| Marital status                  |                    |                   |                  |                  |                   |                   |                   |                   |
| Single/widowed                  | —                  | —                 | 37 (35.9)        | 80 (62.5)        | —                 | —                 | —                 | —                 |
| Married                         |                    |                   | 65 (63.1)        | 46 (35.9)        |                   |                   |                   |                   |
| Unknown                         |                    |                   | 1 (1.0)          | 2 (1.6)          |                   |                   |                   |                   |
| Education level                 |                    |                   |                  |                  |                   |                   |                   |                   |
| ≤Grade 12                       | <b>24 (80.0)</b>   | <b>33 (55.0)</b>  | 40 (38.8)        | 69 (53.9)        | —                 | —                 | —                 | —                 |
| >Grade 12                       | <b>1 (3.3)</b>     | <b>0 (0)</b>      | 34 (33.0)        | 34 (26.6)        |                   |                   |                   |                   |
| Unknown                         | <b>5 (16.7)</b>    | <b>27 (45.0)</b>  | 29 (28.2)        | 25 (19.5)        |                   |                   |                   |                   |
| Social class                    |                    |                   |                  |                  |                   |                   |                   |                   |
| Professional                    | 3 (10.0)           | 1 (1.7)           | <b>16 (15.5)</b> | <b>13 (10.2)</b> | —                 | —                 | —                 | —                 |
| Nonmanual                       | 27 (90.0)          | 53 (88.3)         | <b>21 (20.4)</b> | <b>33 (25.8)</b> |                   |                   |                   |                   |
| Manual                          | 0 (0)              | 3 (5.0)           | <b>41 (39.8)</b> | <b>26 (20.3)</b> |                   |                   |                   |                   |
| Unknown                         | 0 (0)              | 3 (5.0)           | <b>25 (24.3)</b> | <b>56 (43.8)</b> |                   |                   |                   |                   |
| Prestroke health                |                    |                   |                  |                  |                   |                   |                   |                   |
| In an institution               |                    |                   |                  |                  |                   |                   |                   |                   |
| Yes                             | —                  | —                 | —                | —                | —                 | —                 | —                 | —                 |
| No                              |                    |                   |                  |                  |                   |                   |                   |                   |
| Unknown                         |                    |                   |                  |                  |                   |                   |                   |                   |
| Modified Rankin score           |                    |                   |                  |                  |                   |                   |                   |                   |
| 0–2                             | 27 (90.0)          | 45 (75.0)         | —                | —                | —                 | —                 | 28 (70.0)         | 63 (77.8)         |
| 3–5                             | 3 (10.0)           | 9 (15.0)          |                  |                  |                   |                   | 3 (7.5)           | 7 (8.6)           |
| Unknown                         | 0 (0)              | 6 (10.0)          |                  |                  |                   |                   | 9 (22.5)          | 11 (13.6)         |
| BI score                        |                    |                   |                  |                  |                   |                   |                   |                   |
| 20                              | —                  | —                 | —                | —                | —                 | —                 | —                 | —                 |
| <20                             |                    |                   |                  |                  |                   |                   |                   |                   |
| Unknown                         |                    |                   |                  |                  |                   |                   |                   |                   |
| Mean (SD) modified Rankin score | <b>0.6 (1.0)</b>   | <b>1.2 (1.4)</b>  | —                | —                | —                 | —                 | 1.2 (1.0)         | 1.3 (0.9)         |
| Mean (SD) BI                    | —                  | —                 | —                | —                | —                 | —                 | —                 | —                 |
| Medical history                 |                    |                   |                  |                  |                   |                   |                   |                   |
| Hypertension                    |                    |                   |                  |                  |                   |                   |                   |                   |
| Yes                             | 17 (56.7)          | 40 (66.7)         | 66 (64.1)        | 79 (61.7)        | <b>194 (57.1)</b> | <b>341 (64.5)</b> | <b>17 (42.5)</b>  | <b>50 (61.7)</b>  |
| No                              | 13 (43.3)          | 20 (33.3)         | 33 (32.0)        | 40 (31.3)        | <b>144 (42.4)</b> | <b>183 (34.6)</b> | <b>23 (57.7)</b>  | <b>31 (38.3)</b>  |
| Unknown                         | 0 (0)              | 0 (0)             | 4 (3.9)          | 9 (7.0)          | <b>2 (0.6)</b>    | <b>5 (0.9)</b>    | <b>0 (0)</b>      | <b>0 (0)</b>      |
| Ischemic heart disease          |                    |                   |                  |                  |                   |                   |                   |                   |
| Yes                             | 4 (13.3)           | 10 (16.7)         | 43 (41.8)        | 41 (32.0)        | 122 (35.9)        | 175 (33.1)        | 25 (62.50)        | 46 (56.8)         |
| No                              | 26 (86.7)          | 50 (83.3)         | 59 (57.3)        | 87 (68.0)        | 214 (62.9)        | 342 (64.7)        | 15 (37.5)         | 35 (43.2)         |
| Unknown                         | 0 (0)              | 0 (0)             | 1 (1.0)          | 0 (0)            | 4 (1.2)           | 12 (2.3)          | 0 (0)             | 0 (0)             |
| Peripheral vascular disease     |                    |                   |                  |                  |                   |                   |                   |                   |
| Yes                             | <b>1 (3.3)</b>     | <b>1 (1.7)</b>    | —                | —                | 55 (16.2)         | 91 (17.2)         | —                 | —                 |
| No                              | <b>28 (93.3)</b>   | <b>42 (70.0)</b>  |                  |                  | 282 (82.9)        | 422 (79.8)        |                   |                   |
| Unknown                         | <b>1 (3.3)</b>     | <b>17 (28.3)</b>  |                  |                  | 3 (0.9)           | 16 (3.0)          |                   |                   |
| Transient ischemic attack       |                    |                   |                  |                  |                   |                   |                   |                   |
| Yes                             | 2 (6.7)            | 6 (10.0)          | —                | —                | 35 (10.3)         | 45 (8.5)          | 2 (5.0)           | 3 (3.7)           |
| No                              | 28 (93.3)          | 54 (90.0)         |                  |                  | 298 (87.7)        | 464 (87.7)        | 38 (95.0)         | 78 (96.3)         |
| Unknown                         | 0 (0)              | 0 (0)             |                  |                  | 7 (2.1)           | 9 (3.8)           | 0 (0)             | 0 (0)             |
| Diabetes                        |                    |                   |                  |                  |                   |                   |                   |                   |
| Yes                             | —                  | —                 | —                | —                | —                 | —                 | —                 | —                 |
| No                              |                    |                   |                  |                  |                   |                   |                   |                   |
| Unknown                         |                    |                   |                  |                  |                   |                   |                   |                   |
| Dementia                        |                    |                   |                  |                  |                   |                   |                   |                   |
| Yes                             | —                  | —                 | 3 (2.9)          | 1 (0.8)          | —                 | —                 | —                 | —                 |
| No                              |                    |                   | 99 (96.1)        | 125 (97.7)       |                   |                   |                   |                   |
| Unknown                         |                    |                   | 1 (1.0)          | 2 (1.6)          |                   |                   |                   |                   |

(continued)



**Supplementary Table S9. (Continued)**

| Study                                       | Porto (N=90)     |                   | Auckland (N=231) |                  | L'Aquila (N=869)  |                   | Tartu (N=121)  |                 |
|---------------------------------------------|------------------|-------------------|------------------|------------------|-------------------|-------------------|----------------|-----------------|
|                                             | Men, n (%)       | Women, n (%)      | Men, n (%)       | Women, n (%)     | Men, n (%)        | Women, n (%)      | Men, n (%)     | Women, n (%)    |
| Smoking                                     |                  |                   |                  |                  |                   |                   |                |                 |
| Never                                       | <b>19 (63.3)</b> | <b>60 (100.0)</b> | <b>31 (30.1)</b> | <b>62 (48.4)</b> | <b>159 (46.8)</b> | <b>461 (87.2)</b> | —              | —               |
| Current                                     | <b>9 (30.0)</b>  | <b>0 (0)</b>      | <b>57 (55.3)</b> | <b>47 (36.7)</b> | <b>150 (44.1)</b> | <b>14 (2.7)</b>   | —              | —               |
| Former                                      | <b>2 (6.7)</b>   | <b>0 (0)</b>      | <b>8 (7.8)</b>   | <b>8 (6.3)</b>   | —                 | —                 | —              | —               |
| Unknown                                     | <b>0 (0)</b>     | <b>0 (0)</b>      | <b>7 (6.8)</b>   | <b>11 (8.6)</b>  | <b>31 (9.1)</b>   | <b>64 (10.2)</b>  | —              | —               |
| Alcohol use                                 |                  |                   |                  |                  |                   |                   |                |                 |
| Nondrinkers                                 | <b>12 (40.0)</b> | <b>31 (51.7)</b>  | <b>26 (25.2)</b> | <b>64 (50.0)</b> | —                 | —                 | —              | —               |
| Not heavy drinkers                          | —                | —                 | —                | —                | —                 | —                 | —              | —               |
| Heavy drinkers                              | <b>14 (46.7)</b> | <b>10 (16.7)</b>  | <b>49 (47.6)</b> | <b>37 (28.9)</b> | —                 | —                 | —              | —               |
| Ex-drinkers                                 | —                | —                 | <b>13 (12.6)</b> | <b>15 (11.7)</b> | —                 | —                 | —              | —               |
| Unknown                                     | <b>4 (13.3)</b>  | <b>19 (31.7)</b>  | <b>15 (14.6)</b> | <b>12 (9.4)</b>  | —                 | —                 | —              | —               |
| Stroke-related factors                      |                  |                   |                  |                  |                   |                   |                |                 |
| Hospital admission                          |                  |                   |                  |                  |                   |                   |                |                 |
| Yes                                         | 29 (96.7)        | 60 (100.0)        | 102 (99.0)       | 127 (99.2)       | 327 (96.2)        | 508 (96.0)        | 37 (92.5)      | 78 (96.3)       |
| No                                          | 1 (3.3)          | 0 (0)             | 1 (1.0)          | 1 (0.8)          | 21 (96.0)         | 21 (4.0)          | 3 (7.5)        | 3 (3.7)         |
| Time to arrive at hospital                  |                  |                   |                  |                  |                   |                   |                |                 |
| ≤4.5 hours                                  | 13 (43.3)        | 30 (50.0)         | 77 (74.8)        | 108 (84.4)       | —                 | —                 | 11 (27.5)      | 29 (35.8)       |
| >4.5–24 hours                               | 14 (46.7)        | 25 (41.7)         | —                | —                | —                 | —                 | 3 (7.5)        | 3 (3.7)         |
| >24 hours                                   | 1 (3.3)          | 0 (0)             | 11 (10.7)        | 8 (6.3)          | —                 | —                 | 0 (0)          | 1 (1.2)         |
| Unknown                                     | 2 (6.7)          | 5 (8.3)           | 15 (14.6)        | 12 (9.4)         | —                 | —                 | 26 (65.0)      | 48 (59.3)       |
| Stroke severity                             |                  |                   |                  |                  |                   |                   |                |                 |
| Mean (SD) NIHSS                             | —                | —                 | —                | —                | —                 | —                 | 10.4 (7.8)     | 11.7 (9.7)      |
| Median (IQR) NIHSS                          | —                | —                 | —                | —                | —                 | —                 | 8.0 (4.0–19.0) | 12.0 (4.0–19.0) |
| Mean (SD) GCS, reversed                     | —                | —                 | 2.2 (2.5)        | 2.7 (2.6)        | —                 | —                 | —              | —               |
| Mean (IQR) GCS, reversed                    | —                | —                 | 1.0 (1.0–2.0)    | 1.0 (1.0–3.0)    | —                 | —                 | —              | —               |
| Loss of consciousness                       |                  |                   |                  |                  |                   |                   |                |                 |
| Yes                                         | 0 (0)            | 3 (5.0)           | 32 (31.1)        | 45 (35.2)        | 118 (34.7)        | 180 (34.0)        | —              | —               |
| No                                          | 30 (100)         | 57 (95.0)         | 69 (67.0)        | 77 (60.2)        | 215 (63.2)        | 339 (64.1)        | —              | —               |
| Unknown                                     | 0 (0)            | 0 (0)             | 2 (1.9)          | 6 (4.7)          | 7 (2.1)           | 10 (1.9)          | —              | —               |
| Medications at discharge                    |                  |                   |                  |                  |                   |                   |                |                 |
| Antiplatelet agents                         |                  |                   |                  |                  |                   |                   |                |                 |
| Yes                                         | 21 (70.0)        | 35 (58.3)         | 65 (63.1)        | 89 (69.5)        | —                 | —                 | —              | —               |
| No                                          | 9 (30.0)         | 25 (41.7)         | 38 (36.9)        | 37 (28.9)        | —                 | —                 | —              | —               |
| Unknown                                     | 0 (0)            | 0 (0)             | 0 (0)            | 0 (0)            | —                 | —                 | —              | —               |
| Anticoagulant agent                         |                  |                   |                  |                  |                   |                   |                |                 |
| Yes                                         | —                | —                 | 35 (34.0)        | 32 (25.0)        | —                 | —                 | —              | —               |
| No                                          | —                | —                 | 68 (66.0)        | 94 (73.4)        | —                 | —                 | —              | —               |
| Unknown                                     | —                | —                 | 0 (0)            | 2 (1.6)          | —                 | —                 | —              | —               |
| Outcome                                     |                  |                   |                  |                  |                   |                   |                |                 |
| 1-year mortality                            |                  |                   |                  |                  |                   |                   |                |                 |
| Yes                                         | 10 (33.3)        | 37 (61.7)         | 31 (30.1)        | 47 (36.7)        | 1,557 (46.2)      | 270 (51.0)        | 20 (50.0)      | 47 (58.0)       |
| No                                          | 20 (66.8)        | 23 (38.3)         | 72 (69.9)        | 81 (63.3)        | 183 (53.8)        | 259 (49.0)        | 20 (50.0)      | 34 (42.0)       |
| Missing                                     | 0 (0)            | 0 (0)             | 0 (0)            | 0 (0)            | 0 (0)             | 0 (0)             | 0 (0)          | 0 (0)           |
| 5-year mortality                            |                  |                   |                  |                  |                   |                   |                |                 |
| Yes                                         | 20 (66.7)        | 42 (70.0)         | 42 (40.8)        | 64 (50.0)        | 240 (70.6)        | 378 (71.5)        | —              | —               |
| No                                          | 10 (33.3)        | 18 (30.0)         | 61 (59.2)        | 64 (50.0)        | 100 (29.4)        | 151 (28.5)        | —              | —               |
| Missing                                     | 0 (0)            | 0 (0)             | 0 (0)            | 0 (0)            | 0 (0)             | 0 (0)             | —              | —               |
| Poor 1-year functional outcome <sup>a</sup> |                  |                   |                  |                  |                   |                   |                |                 |
| Yes (mRS >2/BI <20)                         | 11 (55.0)        | 14 (60.9)         | —                | —                | —                 | —                 | 6 (30.0)       | 13 (38.2)       |
| No (mRS ≤2/BI =20)                          | 9 (45.0)         | 9 (39.1)          | —                | —                | —                 | —                 | 8 (40.0)       | 18 (52.9)       |
| Unknown                                     | 0 (0)            | 0 (0)             | —                | —                | —                 | —                 | 6 (30.0)       | 3 (8.8)         |
| Poor 5-year functional outcome <sup>a</sup> |                  |                   |                  |                  |                   |                   |                |                 |
| Yes (mRS >2/BI <20)                         | 7 (70.0)         | 14 (77.8)         | 3 (4.9)          | 10 (15.6)        | —                 | —                 | —              | —               |
| No (mRS ≤2/BI =20)                          | 3 (30.0)         | 2 (11.1)          | 13 (21.3)        | 12 (18.8)        | —                 | —                 | —              | —               |
| Unknown                                     | 0 (0)            | 2 (11.1)          | 45 (43.7)        | 43 (65.6)        | —                 | —                 | —              | —               |

Bold denotes statistically significant results.

<sup>a</sup>Among survivors only.



**Supplementary Table S10. Outcomes of Nine Included Cohort Studies in Patients with Ischemic Stroke and Atrial Fibrillation, by Sex**

|                                                             |            |            |              |
|-------------------------------------------------------------|------------|------------|--------------|
| 1-year mortality (nine studies)                             |            |            |              |
| Yes                                                         | 312 (40.9) | 529 (48.1) | <b>0.002</b> |
| No                                                          | 449 (58.9) | 569 (51.7) |              |
| Missing                                                     | 1 (0.1)    | 2 (0.2)    |              |
| 5-year mortality (five studies)                             |            |            |              |
| Yes                                                         | 378 (63.2) | 604 (68.1) | 0.051        |
| No                                                          | 220 (36.8) | 283 (31.9) |              |
| Poor 1-year functional outcome <sup>a</sup> (six studies)   |            |            |              |
| Yes (mRS >2/BI <20)                                         | 58 (31.5)  | 90 (41.3)  | <b>0.007</b> |
| No (mRS ≤2/BI=20)                                           | 99 (53.8)  | 83 (38.1)  |              |
| Unknown                                                     | 27 (14.7)  | 45 (20.6)  |              |
| Poor 5-year functional outcome <sup>a</sup> (three studies) |            |            |              |
| Yes (mRS >2/BI <20)                                         | 25 (23.4)  | 43 (35.5)  | 0.133        |
| No (mRS ≤2/BI=20)                                           | 30 (28.0)  | 28 (23.1)  |              |
| Unknown                                                     | 52 (48.6)  | 50 (41.3)  |              |

Bold denotes statistical significance.

<sup>a</sup>Among survivors only.

**Supplementary Table S11. Mortality Rate Ratio Between Women and Men with Ischemic Stroke and Atrial Fibrillation at 1 Year After Stroke in Crude Models and Models with Adjustment for Age, Severity, and Prestroke Dependency**

| Study     | Total N | N <sup>a</sup> | Unadjusted              |                          | Adjusted for age |                         | Adjusted for severity |                       | Adjusted for prestroke dependency |   |
|-----------|---------|----------------|-------------------------|--------------------------|------------------|-------------------------|-----------------------|-----------------------|-----------------------------------|---|
|           |         |                | MRR (95% CI)            | MRR (95% CI)             | Δ% <sup>b</sup>  | MRR (95% CI)            | Δ% <sup>b</sup>       | MRR (95% CI)          | Δ% <sup>b</sup>                   |   |
| Joinville | 82      | 82             | <b>3.42 (1.29–9.06)</b> | <b>3.52 (1.18–10.54)</b> | –2               | 1.32 (0.43–4.09)        | 77                    | –                     | –                                 | – |
| Melbourne | 230     | 230            | 0.95 (0.60–1.50)        | 0.64 (0.39–1.07)         | –770             | 0.81 (0.43–1.55)        | –310                  | 0.86 (0.53–1.38)      | –194                              | – |
| Arcadia   | 142     | 139            | 0.90 (0.53–1.51)        | 0.94 (0.57–1.57)         | 41               | 0.75 (0.42–1.35)        | –173                  | –                     | –                                 | – |
| Perth     | 32      | 32             | 1.25 (0.33–4.73)        | 1.02 (0.26–4.03)         | 91               | 1.70 (0.38–7.51)        | –138                  | 1.24 (0.33–4.70)      | 4                                 | – |
| Orebro    | 65      | 65             | 1.87 (0.79–4.44)        | 1.47 (0.59–3.67)         | 38               | 1.46 (0.56–3.82)        | 40                    | 1.53 (0.60–3.94)      | 32                                | – |
| Porto     | 90      | 90             | <b>2.79 (1.24–6.31)</b> | <b>2.46 (1.09–5.56)</b>  | 12               | <b>2.58 (1.14–5.85)</b> | 8                     | 2.32 (0.99–5.47)      | 18                                | – |
| Auckland  | 231     | 179            | 1.07 (0.61–1.88)        | 0.95 (0.53–1.69)         | 176              | 0.83 (0.43–1.57)        | 376                   | 1.02 (0.57–1.83)      | 71                                | – |
| L'Aquila  | 869     | 852            | <b>1.19 (1.03–1.38)</b> | 1.12 (0.97–1.28)         | 35               | <b>1.20 (1.04–1.38)</b> | –5                    | –                     | –                                 | – |
| Tartu     | 121     | 111            | 1.19 (0.84–1.69)        | 1.12 (0.78–1.61)         | 35               | 1.10 (0.82–1.47)        | 45                    | 1.16 (0.82–1.64)      | 15                                | – |
| Pooled    | 1,862   | 1,780          | <b>1.24 (1.01–1.51)</b> | 1.12 (0.89–1.39)         | 47               | 1.14 (0.98–1.32)        | 39                    | 1.14 (0.90–1.43)      | 39                                | – |
|           |         |                | $I^2=33.1\%$ $p=0.153$  | $I^2=40.3\%$ $p=0.099$   |                  |                         | $I^2=9.2\%$ $p=0.358$ | $I^2=0.0\%$ $p=0.470$ |                                   |   |

Bold denotes statistically significant results.

<sup>a</sup>The sample size was the same among the unadjusted model, age-adjusted model, and other adjusted models.

<sup>b</sup>% change of coefficient of sex difference in mortality rate ratio that was calculated by the formula (unadjusted  $\beta$ –adjusted  $\beta$ )/unadjusted  $\beta$  × 100. CI, confidence interval; MRR, mortality rate ratio.

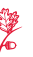

**Supplementary Table S12. Subgroup Analyses of Sex Difference in Mortality at 1 Year After Stroke Among Those with Ischemic Stroke and Atrial Fibrillation by the Availability of Person-Years of Follow-up**

| Person-years | No. of studies | I <sup>2</sup> (%) | Unadjusted     |                  | p <sub>subgroup</sub> | I <sup>2</sup> (%) | Adjusted <sup>a</sup> |                  | p <sub>subgroup</sub> |
|--------------|----------------|--------------------|----------------|------------------|-----------------------|--------------------|-----------------------|------------------|-----------------------|
|              |                |                    | p <sup>H</sup> | MRR (95% CI)     |                       |                    | p <sup>H</sup>        | MRR (95% CI)     |                       |
| Actual       | 7              | 49.6               | 0.064          | 1.38 (0.95–2.01) | 0.731                 | 0.0                | 0.423                 | 0.93 (0.69–1.26) | 0.314                 |
| Estimated    | 2 <sup>a</sup> | 0.0                | 0.994          | 1.19 (1.04–1.36) |                       | 0.0                | 0.675                 | 1.12 (0.99–1.27) |                       |

<sup>a</sup>The L'Aquila and Tartu studies.

**Supplementary Table S13. Mortality Rate Ratio Between Women and Men with Ischemic Stroke and Atrial Fibrillation at 5 Years After Stroke in Crude Models and Models with Adjustment for Age, Severity, and Prestroke Dependency**

| Study     | Total N | N <sup>a</sup> | Unadjusted                   |  | Adjusted for age             |                 | Adjusted for severity        |                 | Adjusted for prestroke dependency |                 |
|-----------|---------|----------------|------------------------------|--|------------------------------|-----------------|------------------------------|-----------------|-----------------------------------|-----------------|
|           |         |                | MRR (95% CI)                 |  | MRR (95% CI)                 | Δ% <sup>b</sup> | MRR (95% CI)                 | Δ% <sup>b</sup> | MRR (95% CI)                      | Δ% <sup>b</sup> |
| Melbourne | 230     | 230            | 1.20 (0.80–1.78)             |  | 0.82 (0.52–1.29)             | 209             | 0.94 (0.59–1.50)             | 134             | 1.19 (0.77–1.83)                  | 5               |
| Orebro    | 65      | 65             | 2.13 (0.95–4.78)             |  | 1.69 (0.71–4.04)             | 31              | 1.91 (0.81–4.48)             | 14              | 1.89 (0.81–4.40)                  | 16              |
| Porto     | 90      | 90             | 1.41 (0.70–2.82)             |  | 1.13 (0.54–2.39)             | 64              | 1.31 (0.65–2.63)             | 21              | 1.01 (0.52–1.99)                  | 8               |
| Auckland  | 231     | 179            | 1.13 (0.71–1.78)             |  | 1.01 (0.64–1.60)             | 92              | 0.93 (0.57–1.53)             | 159             | 1.09 (0.69–1.73)                  | 29              |
| L'Aquila  | 869     | 852            | 1.11 (1.01–1.21)             |  | 1.05 (0.97–1.14)             | 53              | 1.11 (1.02–1.21)             | 0               | —                                 |                 |
| Pooled    | 1,485   | 564            | 1.12 (1.03–1.22)             |  | 1.05 (0.96–1.13)             | 57              | 1.07 (0.81–1.43)             | 40              | 1.18 (0.90–1.54)                  | –46             |
|           |         |                | I <sup>2</sup> =0.0% p=0.556 |  | I <sup>2</sup> =0.0% p=0.670 |                 | I <sup>2</sup> =0.0% p=0.446 |                 | I <sup>2</sup> =0.0% p=0.678      |                 |

Bold denotes statistically significant results.

<sup>a</sup>The sample size was the same among the unadjusted model, age-adjusted model, and fully adjusted model.

<sup>b</sup>% change of coefficient of sex difference in mortality rate ratio that was calculated by the formula (unadjusted β–adjusted β)/unadjusted β × 100.

**Supplementary Table S14. Relative Risk of Having Poorer Functional Outcome for Women Survivors with Ischemic Stroke and Atrial Fibrillation Compared with Men at 1 Year After Stroke in Crude Models and Models with Adjustment for Age, Severity, and Prestroke Dependency**

| Study     | Total N | N <sup>a</sup> | Unadjusted                   |  | Adjusted for age             |                 | Adjusted for severity        |                 | Adjusted for prestroke dependency |                 |
|-----------|---------|----------------|------------------------------|--|------------------------------|-----------------|------------------------------|-----------------|-----------------------------------|-----------------|
|           |         |                | RR (95% CI)                  |  | RR (95% CI)                  | Δ% <sup>b</sup> | RR (95% CI)                  | Δ% <sup>b</sup> | RR (95% CI)                       | Δ% <sup>b</sup> |
| Joinville | 51      | 51             | <b>3.52 (1.04–11.9)</b>      |  | 1.43 (0.45–4.51)             | 72              | 3.09 (0.74–12.9)             | 10              | —                                 |                 |
| Melbourne | 78      | 74             | 1.40 (0.96–2.05)             |  | 1.25 (0.86–1.82)             | 34              | 1.3 4 (0.93–1.94)            | 13              | <b>1.55 (1.02–2.34)</b>           | –30             |
| Arcadia   | 76      | 76             | 1.38 (0.78–2.43)             |  | 1.40 (0.79–2.45)             | –5              | 1.42 (0.81–2.46)             | –9              | —                                 |                 |
| Orebro    | 37      | 37             | 1.42 (0.64–3.12)             |  | 1.04 (0.52–2.10)             | 89              | 1.32 (0.65–2.68)             | 21              | 1.49 (0.68–3.27)                  | –14             |
| Porto     | 43      | 43             | 1.11 (0.66–1.86)             |  | 1.15 (0.69–1.92)             | –34             | 1.11 (0.66–1.86)             | 0               | 1.06 (0.65–1.72)                  | 44              |
| Tartu     | 45      | 41             | 0.95 (0.44–2.05)             |  | 0.84 (0.41–1.72)             | –240            | 0.84 (0.39–1.83)             | –240            | 0.82 (0.40–1.67)                  | –287            |
| Pooled    | 330     | 322            | <b>1.33 (1.05–1.68)</b>      |  | 1.19 (0.94–1.49)             | 39              | <b>1.28 (1.01–1.61)</b>      | 13              | 1.24 (0.96–1.61)                  | 25              |
|           |         |                | I <sup>2</sup> =0.0% p=0.582 |  | I <sup>2</sup> =0.0% p=0.906 |                 | I <sup>2</sup> =0.0% p=0.692 |                 | I <sup>2</sup> =0.0% p=0.431      |                 |

Bold denotes statistically significant results.

<sup>a</sup>The sample size was the same among the unadjusted model, age-adjusted model, and fully adjusted model.

<sup>b</sup>% change of coefficient of sex difference in mortality rate ratio that was calculated by the formula (unadjusted β–adjusted β)/unadjusted β × 100. RR, relative risk.

**Supplementary Table S15. Relative Risk of Having Poorer Functional Outcome for Women Survivors with Ischemic Stroke and Atrial Fibrillation Compared with Men at 5 Years After Stroke in Crude Models and Models with Adjustment for Age, Severity, and Prestroke Dependency**

| Study     | Total N | N <sup>a</sup> | Unadjusted                   |  | Adjusted for age             |                 | Adjusted for severity        |                 | Adjusted for prestroke dependency |                 |
|-----------|---------|----------------|------------------------------|--|------------------------------|-----------------|------------------------------|-----------------|-----------------------------------|-----------------|
|           |         |                | RR (95% CI)                  |  | RR (95% CI)                  | Δ% <sup>b</sup> | RR (95% CI)                  | Δ% <sup>b</sup> | RR (95% CI)                       | Δ% <sup>b</sup> |
| Melbourne | 62      | 62             | 1.11 (0.70–1.77)             |  | 1.01 (0.64–1.60)             | 90              | 1.11 (0.70–1.77)             | 0               | 1.15 (0.69–1.91)                  | –34             |
| Porto     | 26      | 26             | 1.25 (0.79–1.97)             |  | 1.27 (0.82–2.00)             | –7              | 1.25 (0.79–1.97)             | 0               | 1.27 (0.81–2.00)                  | –7              |
| Auckland  | 38      | 27             | 2.35 (0.60–9.20)             |  | 1.80 (0.45–7.22)             | 82              | 2.29 (0.58–9.06)             | 77              | 1.79 (0.42–7.63)                  | 76              |
| Pooled    | 126     | 115            | 1.22 (0.89–1.68)             |  | 1.17 (0.86–1.58)             | 21              | 1.22 (0.89–1.68)             | 0               | <b>1.23 (0.90–1.69)</b>           | –4              |
|           |         |                | I <sup>2</sup> =0.0% p=0.591 |  | I <sup>2</sup> =0.0% p=0.639 |                 | I <sup>2</sup> =0.0% p=0.211 |                 | I <sup>2</sup> =0.0% p=0.835      |                 |

Bold denotes statistically significant results.

<sup>a</sup>The sample size was the same among the unadjusted model, age-adjusted model, and fully adjusted model.

<sup>b</sup>% change of coefficient of sex difference in mortality rate ratio that was calculated by the formula (unadjusted β–adjusted β)/unadjusted β × 100.



**Supplementary Table S16. Relative Risk of Having Poorer Outcome (Either Mortality or Poor Functional Outcome [Modified Rankin Scale >2 or Barthel Index <20]) at 1 Year After Stroke Among Survivors with Ischemic Stroke and Atrial Fibrillation in Crude Models and Adjusted Models Among Studies with Mortality and Functional Outcome Data**

| Study     | N <sup>a</sup> | Unadjusted              |              | Adjusted for age        |              | Adjusted for severity   |              | Adjusted for prestroke dependency |                         | Fully adjusted |              |
|-----------|----------------|-------------------------|--------------|-------------------------|--------------|-------------------------|--------------|-----------------------------------|-------------------------|----------------|--------------|
|           |                | RR (95% CI)             | $\Delta\%^b$ | RR (95% CI)             | $\Delta\%^b$ | RR (95% CI)             | $\Delta\%^b$ | RR (95% CI)                       | $\Delta\%^b$            | RR (95% CI)    | $\Delta\%^b$ |
| Joinville | 77             | <b>2.59 (1.41-4.75)</b> | 21           | <b>2.12 (1.09-4.10)</b> | 27           | <b>2.01 (1.17-3.47)</b> | —            | —                                 | 1.72 (0.92-3.20)        | 43             |              |
| Melbourne | 175            | 1.13 (0.98-1.31)        | 45           | 1.07 (0.93-1.22)        | 15           | 1.11 (0.97-1.28)        | —            | —                                 | 1.07 (0.95-1.23)        | 45             |              |
| Arcadia   | 136            | 1.09 (0.86-1.39)        | -11          | 1.10 (0.87-1.39)        | 32           | 1.06 (0.84-1.34)        | —            | —                                 | 1.06 (0.84-1.33)        | 32             |              |
| Orebro    | 65             | 1.29 (0.88-1.89)        | 66           | 1.09 (0.78-1.52)        | 52           | 1.13 (0.80-1.58)        | —            | —                                 | 0.98 (0.72-1.33)        | 108            |              |
| Porto     | 90             | <b>1.83 (1.14-2.94)</b> | 7            | <b>1.75 (1.08-2.83)</b> | 9            | <b>1.73 (1.08-2.78)</b> | —            | —                                 | <b>1.61 (1.00-2.60)</b> | 36             |              |
| Tartu     | 105            | 1.01 (0.81-1.27)        | 615          | 0.95 (0.75-1.19)        | 303          | 0.98 (0.80-1.20)        | —            | —                                 | 0.99 (0.80-1.23)        | 829            |              |
| Pooled    | 648            | <b>1.25 (1.04-1.50)</b> | 45           | 1.13 (0.97-1.32)        | 33           | 1.16 (0.99-1.34)        | —            | —                                 | 1.14 (0.99-1.32)        | 74             |              |
|           |                | $I^2 = 12.3\%$          | $p = 0.030$  | $I^2 = 9.2\%$           | $p = 0.101$  | $I^2 = 48.1\%$          | $p = 0.086$  | $I^2 = 23.5\%$                    | $p = 0.270$             | $I^2 = 15.2\%$ | $p = 0.317$  |

Bold denotes statistically significant results.

<sup>a</sup>The sample size was the same among the unadjusted model, age-adjusted model, and fully adjusted model.

<sup>b</sup>% change of coefficient of sex difference in mortality rate ratio that was calculated by the formula (unadjusted  $\beta$ -adjusted  $\beta$ )/unadjusted  $\beta \times 100$ .

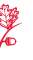



**Supplementary Table S17. Relative Risk of Having Poorer Outcome (Either Died or Poorly Functioned [Modified Rankin Scale >2 or Barthel Index <20]) at 5 Years After Stroke Among Survivors with Ischemic Stroke and Atrial Fibrillation in Crude Models and Adjusted Models Among Studies with Mortality and Functional Outcome Data**

| Study     | N <sup>a</sup> | Unadjusted                                  | Adjusted for age                            |                 | Adjusted for severity                        |                 | Adjusted for prestroke dependency            |                 | Fully adjusted                              |                 |
|-----------|----------------|---------------------------------------------|---------------------------------------------|-----------------|----------------------------------------------|-----------------|----------------------------------------------|-----------------|---------------------------------------------|-----------------|
|           |                | RR (95% CI)                                 | RR (95% CI)                                 | Δ% <sup>b</sup> | RR (95% CI)                                  | Δ% <sup>b</sup> | RR (95% CI)                                  | Δ% <sup>b</sup> | RR (95% CI)                                 | Δ% <sup>b</sup> |
| Melbourne | 217            | 1.05 (0.94–1.17)                            | 0.99 (0.89–1.10)                            | 121             | 1.05 (0.94–1.16)                             | 0               | 1.06 (0.95–1.18)                             | –19             | 1.00 (0.91–1.12)                            | 100             |
| Porto     | 72             | <b>1.76 (1.16–2.67)</b>                     | <b>1.16 (1.07–2.42)</b>                     | 73              | 1.64 (1.09–2.48)                             | 12              | 1.65 (1.07–2.55)                             | 11              | 1.43 (0.94–2.17)                            | 37              |
| Auckland  | 110            | 1.05 (0.89–1.24)                            | 1.01 (0.86–1.18)                            | 80              | 1.04 (0.88–1.22)                             | 20              | 1.02 (0.87–1.20)                             | 59              | 0.99 (0.85–1.16)                            | 121             |
| Pooled    | 399            | 1.18 (0.94–1.49)                            | 1.11 (0.90–1.38)                            | 37              | 1.15 (0.93–1.42)                             | 16              | 1.14 (0.93–1.39)                             | 21              | 1.06 (0.90–1.25)                            | 65              |
|           |                | <i>I</i> <sup>2</sup> =8.6% <i>p</i> =0.014 | <i>I</i> <sup>2</sup> =8.0% <i>p</i> =0.019 |                 | <i>I</i> <sup>2</sup> =72.5% <i>p</i> =0.026 |                 | <i>I</i> <sup>2</sup> =69.6% <i>p</i> =0.037 |                 | <i>I</i> <sup>2</sup> =4.9% <i>p</i> =0.085 |                 |

Bold denotes statistically significant results.

<sup>a</sup>The sample size was the same among the unadjusted model, age-adjusted model, and fully adjusted model.

<sup>b</sup>% change of coefficient of sex difference in mortality rate ratio that was calculated by the formula (unadjusted β–adjusted β)/unadjusted β × 100.

## Supplementary References

- S1. Cabral NL, Goncalves ARR, Longo AL, et al. Incidence of stroke subtypes, prognosis and prevalence of risk factors in Joinville, Brazil: A 2 year community based study. *J Neurol Neurosurg Psychiatry* 2009;80:755.
- S2. Sturm JW, Donnan GA, Dewey HM, Macdonell RA, Gilligan AK, Thrift AG. Determinants of handicap after stroke: The North East Melbourne Stroke Incidence Study (NEMESIS). *Stroke* 2004;35:715–720.
- S3. Vemmos KN, Bots ML, Tsibouris PK, et al. Stroke incidence and case fatality in southern Greece: The Arcadia stroke registry. *Stroke* 1999;30:363–370.
- S4. Anderson CS, Jamrozik KD, Broadhurst RJ, Stewart-Wynne EG. Predicting survival for 1 year among different subtypes of stroke. Results from the Perth Community Stroke Study. *Stroke* 1994;25:1935–1944.
- S5. Appelros P, Nydevik I, Seiger Å, Terént A. High incidence rates of stroke in Örebro, Sweden: Further support for regional incidence differences within Scandinavia. *Cerebrovasc Dis* 2002;14:161–168.
- S6. Correia M, Silva MR, Matos I, et al. Prospective community-based study of stroke in Northern Portugal: Incidence and case fatality in rural and urban populations. *Stroke* 2004;35:2048–2053.
- S7. Feigin V, Carter K, Hackett M, et al. Ethnic disparities in incidence of stroke subtypes: Auckland Regional Community Stroke Study, 2002–2003. *Lancet Neurol* 2006;5:130–139.
- S8. Carolei A, Marini C, Di Napoli M, et al. High stroke incidence in the prospective community-based L'Aquila registry (1994–1998). First year's results. *Stroke* 1997;28:2500–2506.
- S9. Marini C, De Santis F, Sacco S, et al. Contribution of atrial fibrillation to incidence and outcome of ischemic stroke: Results from a population-based study. *Stroke* 2005;36:1115–1119.
- S10. Kõrv J, Roose M, Kaasik A-E. Stroke Registry of Tartu, Estonia, from 1991 through 1993. *Cerebrovasc Dis* 1997;7:154–162.
- S11. Kent DM, Price LL, Ringleb P, Hill MD, Selker HP. Sex-based differences in response to recombinant tissue plasminogen activator in acute ischemic stroke: A pooled analysis of randomized clinical trials. *Stroke* 2005;36:62–65.
- S12. Lasek-Bal A, Szymalski J, Kazibutowska Z. Stroke risk factors, course and long-term functional outcome of first-ever stroke in women. *Open Access Maced J Med Sci* 2014;2:119–123.
- S13. Akanksha G, Paramdeep K, Gagandeep S, et al. Clinical features, risk factors, and short-term outcome of ischemic stroke, in patients with atrial fibrillation: Data from a population-based study. *Ann Indian Acad Neurol* 2017;20:289–293.
- S14. Yesilot NF, Koyuncu BA, Coban O, Tuncay R, Bahar SZ. Gender differences in acute stroke: Istanbul medical school stroke registry. *Neurol India* 2011;59:174–179.
- S15. Irie F, Kamouchi M, Hata J, et al. Sex differences in short-term outcomes after acute ischemic stroke: The fukuoka stroke registry. *Stroke* 2015;46:471–476.
- S16. Huang Y, Wang J, Wei JW, et al. Age and gender variations in the management of ischaemic stroke in China. *Int J Stroke* 2010;5:351–359.
- S17. Hametner C, MacIsaac RL, Kellert L, et al. Sex and stroke in thrombolysed patients and controls. *Stroke* 2017;48:367–374.
- S18. Hametner C, Kellert L, Ringleb PA. Impact of sex in stroke thrombolysis: A coarsened exact matching study. *BMC Neurol* 2015;15:10.
- S19. Gray LJ, Sprigg N, Bath PM, et al. Sex differences in quality of life in stroke survivors: Data from the Tinzaparin in Acute Ischaemic Stroke Trial (TAIST). *Stroke* 2007;38:2960–2964.
- S20. Nakamura A, Kuroda J, Ago T, et al. Causes of ischemic stroke in patients with non-valvular atrial fibrillation. *Cerebrovasc Dis* 2016;42:196–204.
- S21. Munoz-Rivas N, Mendez-Bailon M, Hernandez-Barrera V, et al. Time trends in ischemic stroke among type 2 diabetic and non-diabetic patients: Analysis of the Spanish national hospital discharge data (2003–2012). *PLoS One* 2015;10:e0145535.
- S22. Martin-Merino E, Ruigomez A, Johansson S, Garcia-Rodriguez LA. Hospitalised ischaemic cerebrovascular accident and risk factors in a primary care database. *Pharmacoepidemiol Drug Saf* 2011;20:1050–1056.
- S23. Kongbunkiat K, Kasemsap N, Travanichakul S, Thepsuthammarat K, Tiangkao S, Sawanyawisuth K. Hospital mortality from atrial fibrillation associated with ischemic stroke: A national data report. *Int J Neurosci* 2015;125:924–928.
- S24. Giralte-Steinhauer E, Cuadrado-Godia E, Ois A, et al. CHA<sub>2</sub>DS<sub>2</sub>-VASc score and prognosis in ischemic strokes with atrial fibrillation. *J Neurol* 2012;259:745–751.
- S25. Kim TW, Jung SW, Song IU, et al. Left atrial dilatation is associated with severe ischemic stroke in men with non-valvular atrial fibrillation. *J Neurol Sci* 2015;354:97–102.
- S26. Heuschmann PU, Kolominsky-Rabas PL, Misselwitz B, et al. Predictors of in-hospital mortality and attributable risks of death after ischemic stroke: The German Stroke Registers Study Group. *Arch Intern Med* 2004;164:1761–1768.
- S27. Candelise L, Pinardi G, Morabito A. Mortality in acute stroke with atrial fibrillation. The Italian Acute Stroke Study Group. *Stroke* 1991;22:169–174.
- S28. Kapral MK, Devon J, Winter AL, Wang J, Peters A, Bondy SJ. Gender differences in stroke care decision-making. *Med Care* 2006;44:70–80.
- S29. Kapral MK, Ben-Yakov M, Fang J, et al. Gender differences in carotid imaging and revascularization following stroke. *Neurology* 2009;73:1969–1974.
- S30. Sen Lin S, Lin S, Wu B, et al. Characteristics, treatment and outcome of ischemic stroke with atrial fibrillation in a Chinese hospital-based stroke study. *Cerebrovasc Dis* 2011;31:419–426.
- S31. Lisabeth LD, Brown DL, Hughes R, Majersik JJ, Morgenstern LB. Acute stroke symptoms: Comparing women and men. *Stroke* 2009;40:2031–2036.
- S32. Lisabeth LD, Roychoudhury C, Brown DL, Levine SR. Do gender and race impact the use of antithrombotic therapy in patients with stroke/TIA? *Neurology* 2004;62:2313–2315.



533. Lorenzano S, Ahmed N, Falcou A, et al. Does sex influence the response to intravenous thrombolysis in ischemic stroke?: Answers from safe implementation of treatments in Stroke-International Stroke Thrombolysis Register. *Stroke* 2013;44:3401–3406.
534. Martinez-Sanchez P, Fuentes B, Fernandez-Dominguez J, et al. Young women have poorer outcomes than men after stroke. *Cerebrovasc Dis* 2011;31:455–463.
535. McDermott M, Lisabeth LD, Baek J, et al. Sex disparity in stroke quality of care in a community-based study. *J Stroke Cerebrovasc Dis* 2017;26:1781–1786.
536. Meseguer E, Mazighi M, Labreuche J, et al. Outcomes of intravenous recombinant tissue plasminogen activator therapy according to gender: A clinical registry study and systematic review. *Stroke* 2009;40:2104–2110.
537. Mizrahi EH, Waitzman A, Arad M, Adunsky A. Atrial fibrillation predicts cognitive impairment in patients with ischemic stroke. *Am J Alzheimers Dis Other Dement* 2011;26:623–626.
538. Nagaraja N, Bhattacharya P, Mada F, et al. Gender based differences in acute stroke care in Michigan hospitals. *J Neurol Sci* 2012;314:88–91.
539. Mizrahi EH, Waitzman A, Arad M, Adunsky A. Gender and the functional outcome of elderly ischemic stroke patients. *Arch Gerontol Geriatr* 2012;55:438–441.
540. Olsen TS, Andersen KK. Female survival advantage relates to male inferiority rather than female superiority: A hypothesis based on the impact of age and stroke severity on 1-week to 1-year case fatality in 40,155 men and women. *Gen Med* 2010;7:284–295.
541. Padjen V, Bodenart M, Jovanovic DR, et al. Outcome of patients with atrial fibrillation after intravenous thrombolysis for cerebral ischaemia. *J Neurol* 2013;260:3049–3054.
542. Rodriguez-Campello A, Jimenez-Conde J, Ois A, et al. Sex-related differences in abdominal obesity impact on ischemic stroke risk. *Eur J Neurol* 2017;24:397–403.
543. Silva GS, Lima FO, Camargo EC, et al. Gender differences in outcomes after ischemic stroke: Role of ischemic lesion volume and intracranial large-artery occlusion. *Cerebrovasc Dis* 2010;30:470–475.
544. Smith MA, Lisabeth LD, Brown DL, Morgenstern LB. Gender comparisons of diagnostic evaluation for ischemic stroke patients. *Neurology* 2005;65:855–858.
545. Spaander FH, Zinkstok SM, Baharoglu IM, et al. Sex differences and functional outcome after intravenous Thrombolysis. *Stroke* 2017;48:699–703.
546. Tafreshi GM, Raman R, Ernstrom K, Meyer BC, Hemmen TM. Gender differences in acute stroke treatment: The University of California San Diego experience. *Stroke* 2010;41:1755–1757.
547. Tomita H, Hagii J, Metoki N, et al. Impact of sex difference on severity and functional outcome in patients with cardioembolic stroke. *J Stroke Cerebrovasc Dis* 2015;24:2613–2618.
548. Turaj W, Slowik A, Wnuk M, Szczudlik A. Gender-related differences in diagnostic evaluation and outcome of ischemic stroke in Poland. *Stroke* 2009;40:980–982.
549. Vodonos A, Novack V, Horev A, Abu Salameh I, Lotan Y, Ifergane G. Do gender and season modify the triggering effect of ambient temperature on ischemic stroke? *Womens Health Issues* 2017;27:245–251.
550. Zhang B, Pu S, Zhang W, et al. Sex differences in risk factors, etiology, and short-term outcome of cerebral infarction in young patients. *Atherosclerosis* 2011;216:420–425.
551. Asdaghi N, Romano JG, Wang K, et al. Sex Disparities in ischemic stroke care: FL-PR CReSD Study (Florida-Puerto Rico Collaboration to reduce stroke disparities). *Stroke* 2016;47:2618–2626.
552. Buijs JE, Uyttenboogaart M, Brouns R, de Keyser J, Kamphuisen PW, Luijckx GJ. The effect of age and sex on clinical outcome after intravenous recombinant tissue plasminogen activator treatment in patients with acute ischemic stroke. *J Stroke Cerebrovasc Dis* 2016;25:312–316.
553. Caso V, Paciaroni M, Agnelli G, et al. Gender differences in patients with acute ischemic stroke. *Womens Health (Lond)* 2010;6:51–57.
554. de Ridder I, Kuramatsu J, Gerner S, et al. No sex differences in long-term functional outcome after intracerebral hemorrhage. *Int J Stroke* 2017;12:416–420.
555. Denti L, Artoni A, Scoditti U, et al. Impact of gender-age interaction on the outcome of ischemic stroke in an Italian cohort of patients treated according to a standardized clinical pathway. *Eur J Intern Med* 2013;24:807–812.
556. Dhamoon MS, Liang JW, Zhou L, Stampelcoski M, Kapral MK, Shah BR. Sex differences in outcomes after stroke in patients with diabetes in Ontario, Canada. *J Stroke Cerebrovasc Dis* 2018;27:210–220.
557. Kim SJ, Ryoo S, Kwon S, et al. Is atrial fibrillation always a culprit of stroke in patients with atrial fibrillation plus stroke? *Cerebrovasc Dis* 2013;36:373–382.
558. Chiti A, Giannini N, Terni E, et al. “Cardioembolic profile” in patients with ischemic stroke: Data from the analysis of 1037 cases. *J Stroke Cerebrovasc Dis* 2015;24:1287–1290.
559. Benbir G, Uluduz D, Ince B, Bozulucay M. Atherothrombotic ischemic stroke in patients with atrial fibrillation. *Clin Neurol Neurosurg* 2007;109:485–490.
560. Baturova MA, Sheldon SH, Carlson J, et al. Electrocardiographic and Echocardiographic predictors of paroxysmal atrial fibrillation detected after ischemic stroke. *BMC Cardiovasc Dis* 2016;16:209.
561. Allende M, Molina E, Gonzalez-Porras JR, Toledo E, Lecumberri R, Hermida J. Short leukocyte telomere length is associated with cardioembolic stroke risk in patients with atrial fibrillation. *Stroke* 2016;47:863–865.
562. Horner S, Niederkorn K, Schnabl S, Fazekas F, MitarbeiterInnen am Osterreichischen Stroke-Unit Register und in Zusammenarbeit mit der Gesundheit Osterreich GmbH, Geschäftsbereich BIQS. [Gender aspects of ischemic stroke. An analysis of the Austrian Stroke-Unit Registry]. *Wien Med Wochenschr* 2008;158:446–452.
563. Etherton MR, Wu O, Cougo P, et al. Structural integrity of normal appearing white matter and sex-specific outcomes after acute ischemic stroke. *Stroke* 2017;48:3387–3389.
564. Colello MJ, Ivey LE, Gainey J, et al. Pharmacological thrombolysis for acute ischemic stroke treatment: Gender differences in clinical risk factors. *Adv Med Sci* 2018;63:100–106.
565. Niewada M, Kobayashi A, Sandercock PA, Kaminski B, Czlonkowska A, International Stroke Trial Collaborative Group. Influence of gender on baseline features and clinical outcomes among 17,370 patients with confirmed ischaemic stroke in the international stroke trial. *Neuroepidemiology* 2005;24:123–128.
566. Perera KS, Vanassche T, Bosch J, et al. Global survey of the frequency of atrial fibrillation-associated stroke: Embolic stroke of undetermined source global registry. *Stroke* 2016;47:2197–2202.
567. Sakamoto Y, Sato S, Kuronuma Y, Nagatsuka K, Minematsu K, Toyoda K. Factors associated with proximal carotid axis occlusion in patients with acute stroke and atrial fibrillation. *J Stroke Cerebrovasc Dis* 2014;23:799–804.
568. Salihovic D, Smajlovic D, Sinanovic O, Kojic B. Sex differences in patients with acute ischemic stroke in Tuzla region, Bosnia and Herzegovina. *Bosn J Basic Med Sci* 2010;10:116–120.
569. Seo WK, Kang SH, Jung JM, Choi JY, Oh K. Novel composite score to predict atrial Fibrillation in acute stroke patients: AF predicting score in acute stroke. *Int J Cardiol* 2016;209:184–189.
570. Waldenhjort D, Sobocinski Doliwa P, Alam M, et al. Echocardiographic measures of atrial function may predict atrial fibrillation in stroke patients. *Scand Cardiovasc J* 2016;50:236–242.
571. Yesilot Barlas N, Putaala J, Waje-Andreassen U, et al. Etiology of first-ever ischaemic stroke in European young adults: The 15 cities young stroke study. *Eur J Neurol* 2013;20:1431–1439.
572. Forster A, Gass A, Kern R, et al. Gender differences in acute ischemic stroke: Etiology, stroke patterns and response to thrombolysis. *Stroke* 2009;40:2428–2432.
573. Martin RC, Burgin WS, Schabath MB, et al. Gender-specific differences for risk of disability and death in atrial fibrillation-related stroke. *Am J Cardiol* 2017;119:256–261.
574. Nezu T, Hosomi N, Kondo K, et al. Greater severity of neurological defects in women admitted with atrial fibrillation-related stroke. *Circ J* 2016;80:250–255.
575. Lang C, Seyfang L, Ferrari J, et al. Do women with atrial fibrillation experience more severe strokes?: Results from the Austrian Stroke Unit Registry. *Stroke* 2017;48:778–780.
576. Li B, Wang T, Lou Y, et al. Sex differences in outcomes and associated risk factors after acute ischemic stroke in elderly patients: A prospective follow-up study. *J Stroke Cerebrovasc Dis* 2015;24:2277–2284.



- S77. Min K, Kwon S, Cho SY, et al. Atrial fibrillation is strongly associated with the neutrophil to lymphocyte ratio in acute ischemic stroke patients: A retrospective study. *J Clin Lab Anal* 2017;31:e22041.
- S78. Jonsson AC, Ek J, Kremer C. Outcome of men and women after atrial fibrillation and stroke. *Acta Neurol Scand* 2015;132:125–131.
- S79. Cuadrado-Godia E, Jimenez-Conde J, Ois A, Rodriguez-Campello A, Garcia-Ramallo E, Roquer J. Sex differences in the prognostic value of the lipid profile after the first ischemic stroke. *J Neurol* 2009;256:989–995.
- S80. Zou C, Wei C, Wang Z, Jin Y. Sex differences in outcomes and risk factors among elderly patients with ischemic stroke. *Oncotarget* 2017;8:104582–104593.
- S81. Ong CT, Wong YS, Sung SF, et al. Sex-related differences in the risk factors for in-hospital mortality and outcomes of ischemic stroke patients in rural areas of Taiwan. *PLoS One* 2017;12:e0185361.
- S82. Hong Y, Yang X, Zhao W, et al. Sex differences in outcomes among stroke survivors with non-valvular atrial fibrillation in China. *Front Neurol* 2017;8:166.
- S83. Yao XY, Lin Y, Geng JL, et al. Age- and gender-specific prevalence of risk factors in patients with first-ever ischemic stroke in China. *Stroke Res Treat* 2012;2012:136398.
- S84. Boehme AK, Siegler JE, Mullen MT, et al. Racial and gender differences in stroke severity, outcomes, and treatment in patients with acute ischemic stroke. *J Stroke Cerebrovasc Dis* 2014;23:e255–e261.
- S85. Putaala J, Metso AJ, Metso TM, et al. Analysis of 1008 consecutive patients aged 15 to 49 with first-ever ischemic stroke: The Helsinki young stroke registry. *Stroke* 2009;40:1195–1203.
- S86. Park TH, Ko Y, Lee SJ, et al. Gender differences in the age-stratified prevalence of risk factors in Korean ischemic stroke patients: A nationwide stroke registry-based cross-sectional study. *Int J Stroke* 2014;9:759–765.
- S87. Andersen KK, Andersen ZJ, Olsen TS. Age- and gender-specific prevalence of cardiovascular risk factors in 40,102 patients with first-ever ischemic stroke: A Nationwide Danish Study. *Stroke* 2010;41:2768–2774.
- S88. Oh MS, Yu KH, Roh JK, Lee BC. Gender differences in the mortality and outcome of stroke patients in Korea. *Cerebrovasc Dis* 2009;28:427–434.
- S89. Novello P, Ajmar G, Bianchini D, et al. Ischemic stroke and atrial fibrillation. A clinical study. *Ital J Neurol Sci* 1993;14:571–576.
- S90. Simpson CR, Wilson C, Hannaford PC, Williams D. Evidence for age and sex differences in the secondary prevention of stroke in Scottish primary care. *Stroke* 2005;36:1771–1775.
- S91. Reeves MJ, Fonarow GC, Zhao X, Smith EE, Schwamm LH. Quality of care in women with ischemic stroke in the GWTG program. *Stroke* 2009;40:1127–1133.
- S92. Sjolander M, Eriksson M, Glader EL. Few sex differences in the use of drugs for secondary prevention after stroke: A nationwide observational study. *Pharmacoepidemiol Drug Saf* 2012;21:911–919.
- S93. Yu C, An Z, Zhao W, et al. Sex differences in stroke subtypes, severity, risk factors, and outcomes among elderly patients with acute ischemic stroke. *Front Aging Neurosci* 2015;7:174.
- S94. Ghandehari K, Shuaib A, Ardalani GF. The frequency rate of cardioembolic etiology in North American and Iranian stroke patients: A pilot double-center study. *Iran Red Crescent Med J* 2008;10:66–68.
- S95. Morin-Martin M, Gonzalez-Santiago R, Gil-Nunez AC, Vivancos-Mora J. [Women and strokes. Hospital epidemiology in Spain]. *Rev Neurol* 2003;37:701–705.
- S96. Tiseo C, Ornello R, Degan D, et al. Time trends of atrial fibrillation prevalence in patients with first ever ischemic stroke. *Eur Stroke J* 2017;2 (1 Supplement 1):191–192.
- S97. Towfighi A, Markovic D, Ovbiagele B. Sex differences in revascularization interventions after acute ischemic stroke. *J Stroke Cerebrovasc Dis* 2013;22:e347–e353.
- S98. Gattringer T, Ferrari J, Knoflach M, et al. Sex-related differences of acute stroke unit care: Results from the Austrian stroke unit registry. *Stroke* 2014;45:1632–1638.
- S99. Nathanson D, Patrone C, Nystrom T, Von Euler M. Sex, diastolic blood pressure, and outcome after thrombolysis for ischemic stroke. *Stroke Res Treat* 2014;2014:747458.
- S100. Bae HJ, Heo JH, Jung KH, et al. Antithrombotic treatments in patients with acute ischemic stroke and non-valvular atrial fibrillation before introduction of non-Vitamin K antagonist oral anticoagulants into practice in Korea. *PLoS One* 2018;13:e0202803.
- S101. Barreira CM, Bouslama M, Al-Bayati AR, et al. Endovascular therapy and gender disparities in stroke outcomes. *Eur Stroke J* 2018;3 (1 Supplement 1):56.
- S102. Burzhunova M, Alieva M, Geraskina L, Garabova N, Fonyakin A. Gender differences in patients with stroke and atrial fibrillation. *Eur Stroke J* 2018;3 (1 Supplement 1):404.
- S103. Chou PS, Ho BL, Chan YH, Wu MH, Hu HH, Chao AC. Delayed diagnosis of atrial fibrillation after first-ever stroke increases recurrent stroke risk: A 5-year nationwide follow-up study. *Int Med J* 2018;48:661–667.
- S104. Christensen L, Christensen H. Exploring the sex differences in atrial fibrillation and stroke in a cohort of 1178 patients with 10 year follow up. *Eur Stroke J* 2018;3 (1 Supplement 1):511.
- S105. Hung KH, Lai JC, Hsu KN, et al. Gender gap and risk factors for poor stroke outcomes: A single hospital-based prospective cohort study. *J Stroke Cerebrovasc Dis* 2018;27:2250–2258.
- S106. Keller K, Geyer M, Munzel T, Ostad MA. Gender-differences in prevalence and outcome of ischemic stroke and promoting factors of atrial thrombi. *Artery Res* 2018;22:68–78.
- S107. Radivojevic A, Budimkic M, Stanarcevic P, et al. Dowomen suffer more from stroke? *Eur Stroke J* 2018;3 (1 Supplement 1):512–513.
- S108. McGrath ER, Kapral MK, Fang J, et al. Association of atrial fibrillation with mortality and disability after ischemic stroke. *Neurology* 2013;81:825–832.
- S109. Antonenko K, Paciaroni M, Agnelli G, et al. Sex-related differences in risk factors, type of treatment received and outcomes in patients with atrial fibrillation and acute stroke: Results from the RAF-study (early recurrence and cerebral bleeding in patients with acute ischemic stroke and atrial fibrillation). *Eur Stroke J* 2017;2:46–53.
- S110. Moro CH, Goncalves AR, Longo AL, et al. Trends of the incidence of ischemic stroke thrombolysis over seven years and one-year outcome: A population-based study in Joinville, Brazil. *Cerebrovasc Dis Extra* 2013;3:156–166.
- S111. Gall SL, Donnan G, Dewey HM, et al. Sex differences in presentation, severity, and management of stroke in a population-based study. *Neurology* 2010;74:975–981.
- S112. Vemmos KN, Bots ML, Tsibouris PK, et al. Prognosis of stroke in the south of Greece: 1 year mortality, functional outcome and its determinants: The Arcadia Stroke Registry. *J Neurol Neurosurg Psychiatry* 2000;69:595–600.
- S113. Hankey GJ, Jamrozik K, Broadhurst RJ, et al. Five-year survival after first-ever stroke and related prognostic factors in the Perth Community Stroke Study. *Stroke* 2000;31:2080–2086.
- S114. Appelros P, Nydevik I, Seiger A, Terent A. High incidence rates of stroke in Orebro, Sweden: Further support for regional incidence differences within Scandinavia. *Cerebrovasc Dis* 2002;14:161–168.
- S115. Correia M, Magalhaes R, Silva MR, Matos I, Silva MC. Stroke types in rural and urban northern portugal: Incidence and 7-year survival in a community-based study. *Cerebrovasc Dis Extra* 2013;3:137–149.
- S116. Feigin VL, Barker-Collo S, Parag V, et al. Auckland Stroke Outcomes Study. Part 1: Gender, stroke types, ethnicity, and functional outcomes 5 years poststroke. *Neurology* 2010;75:1597–1607.
- S117. Vibo R, Korv J, Roose M. One-year outcome after first-ever stroke according to stroke subtype, severity, risk factors and pre-stroke treatment. A population-based study from Tartu, Estonia. *Eur J Neurol* 2007;14:435–439.
- S118. Tentschert S, Parigger S, Dorda V, et al. Recurrent vascular events in patients with ischemic stroke/TIA and atrial fibrillation in relation to secondary prevention at hospital discharge. *Wien Klin Wochenschr* 2004;116:834–838.
- S119. Eriksson M, Glader EL, Norrving B, et al. Sex differences in stroke care and outcome in the Swedish national quality register for stroke care. *Stroke* 2009;40:909–914.

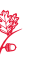

Supplement: Suppl_TableS1-S17.pdf [file Suppl_TableS1-S17.pdf]
