# Supplementary material for: Sex Differences in Disease Profiles, Management, and Outcomes Among People with Atrial Fibrillation After Ischemic Stroke: Aggregated and Individual Participant Data Meta-Analyses
Source: PubMed Central journal article supplement (PMC7784810; doi:10.1089/whr.2020.0029), 2020-06-30

## Supplementary Data

### Search Strategy

#### MEDLINE

- (1) exp STROKE/
- (2) (stroke or poststroke or post-stroke).mp. [mp=title, abstract, heading word, drug trade name, original title, device manufacturer, drug manufacturer, device trade name, keyword, floating subheading word]
- (3) Sex Factors/
- (4) ((sex or gender) adj2 distribution).mp.
- (5) ((sex or gender) adj2 difference\*).mp.
- (6) (gender-based or gender-related or gender differences or gender factors).mp.
- (7) ((sex or gender) adj3 (analysis or factor\$ or inequit\$ or disparit\$ or inequalit\$ or difference\$ or interact\$)).mp.
- (8) 1 or 2
- (9) 3 or 4 or 5 or 6 or 7
- (10) 8 and 9
- (11) limit 10 to (humans and "all adult (19 plus years)")

#### Embase Classic and Embase

- (1) exp STROKE/
- (2) (stroke or poststroke or post-stroke).mp. [mp=title, abstract, heading word, drug trade name, original title, device manufacturer, drug manufacturer, device trade name, keyword, floating subheading word]
- (3) Sex Factors/
- (4) ((sex or gender) adj2 distribution).mp.
- (5) ((sex or gender) adj2 difference\*).mp.
- (6) (gender-based or gender-related or gender differences or gender factors).mp.
- (7) ((sex or gender) adj3 (analysis or factor\$ or inequit\$ or disparit\$ or inequalit\$ or difference\$ or interact\$)).mp.
- (8) 1 or 2
- (9) 3 or 4 or 5 or 6 or 7
- (10) 8 and 9
- (11) limit 10 to (human and (adult <18 to 64 years> or aged <65+ years>))

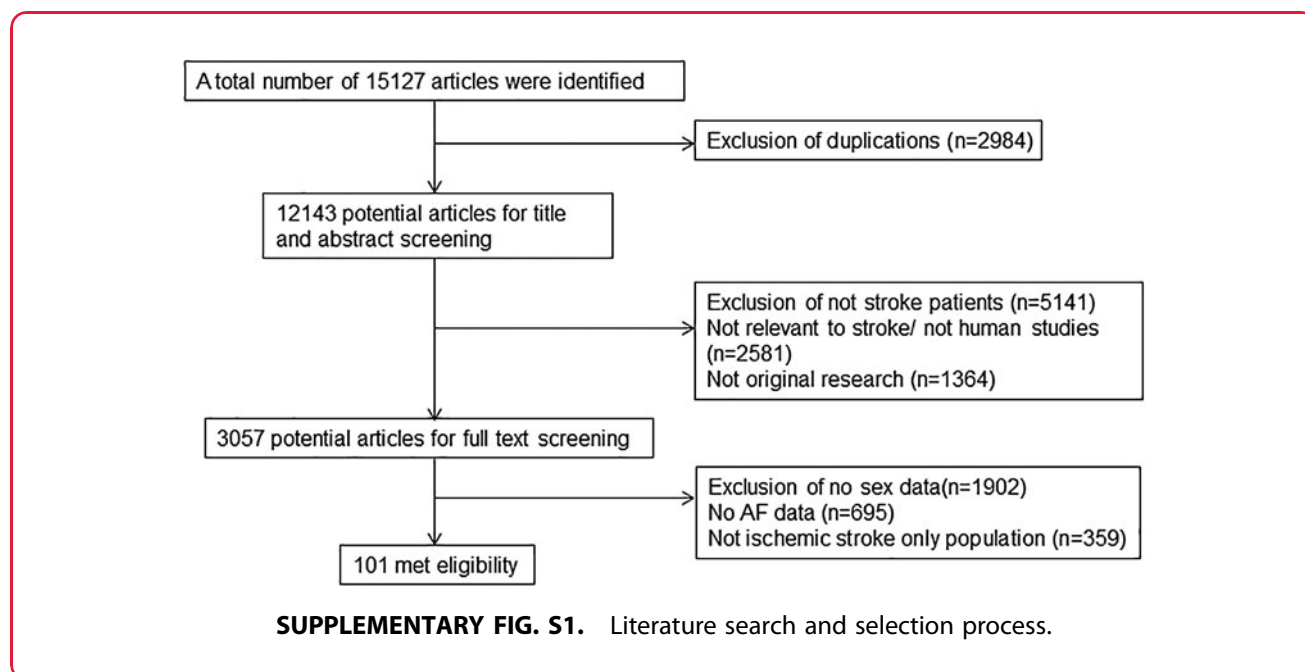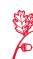

Supplement: Suppl_FigS1.pdf [file Suppl_FigS1.pdf]
