# Supplementary material for: Sex Differences in Disease Profiles, Management, and Outcomes Among People with Atrial Fibrillation After Ischemic Stroke: Aggregated and Individual Participant Data Meta-Analyses
Source: PubMed Central journal article supplement (PMC7784810; doi:10.1089/whr.2020.0029), 2020-06-30

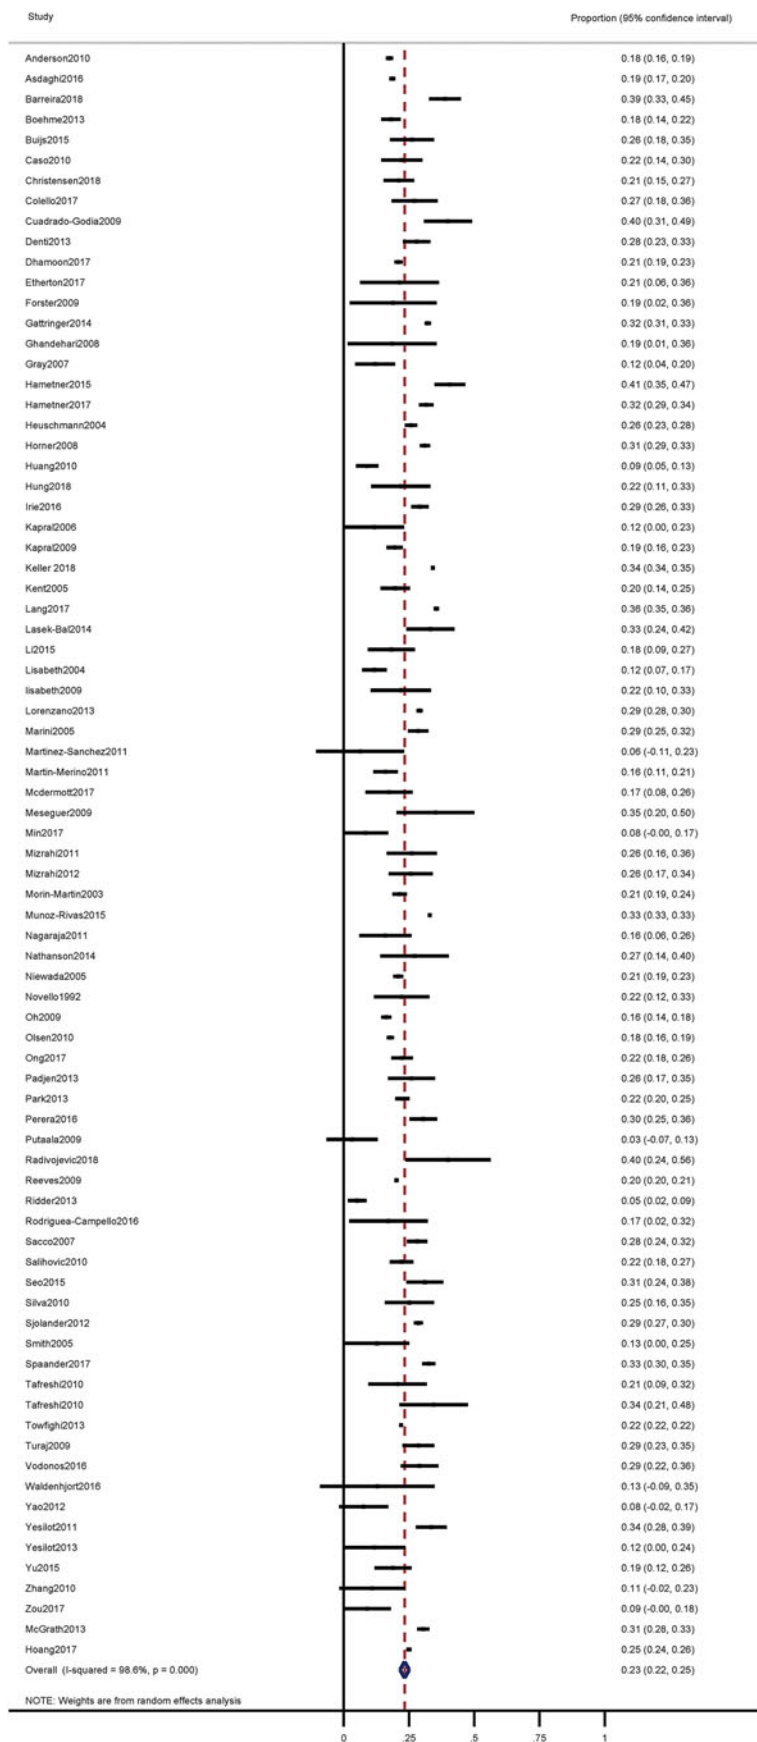

**SUPPLEMENTARY FIG. S2.** Proportion of AF in participants with ischemic stroke among women. A normal approximation was used to calculate the confidence interval, therefore, the negative lower confidence limits appear for anomalies. AF, atrial fibrillation.

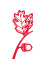

Supplement: Suppl_FigS2.pdf [file Suppl_FigS2.pdf]
