# Supplementary material for: Sex Differences in Disease Profiles, Management, and Outcomes Among People with Atrial Fibrillation After Ischemic Stroke: Aggregated and Individual Participant Data Meta-Analyses
Source: PubMed Central journal article supplement (PMC7784810; doi:10.1089/whr.2020.0029), 2020-06-30
Supplement: Suppl_FigS4.pdf [file Suppl_FigS4.pdf]

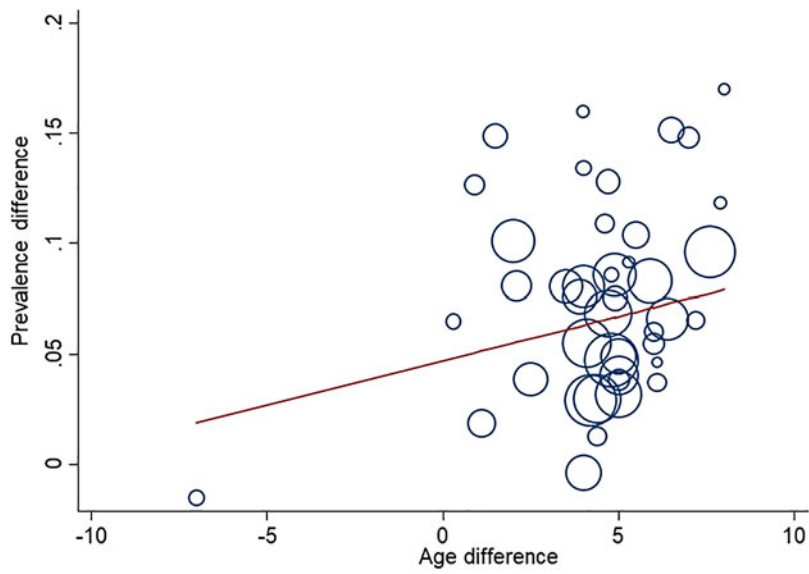

**SUPPLEMENTARY FIG. S4.** Meta-regression of age difference on the prevalence of AF in participants with ischemic stroke (women vs. men).
