# Supplementary material for: Sex Differences in Disease Profiles, Management, and Outcomes Among People with Atrial Fibrillation After Ischemic Stroke: Aggregated and Individual Participant Data Meta-Analyses
Source: PubMed Central journal article supplement (PMC7784810; doi:10.1089/whr.2020.0029), 2020-06-30

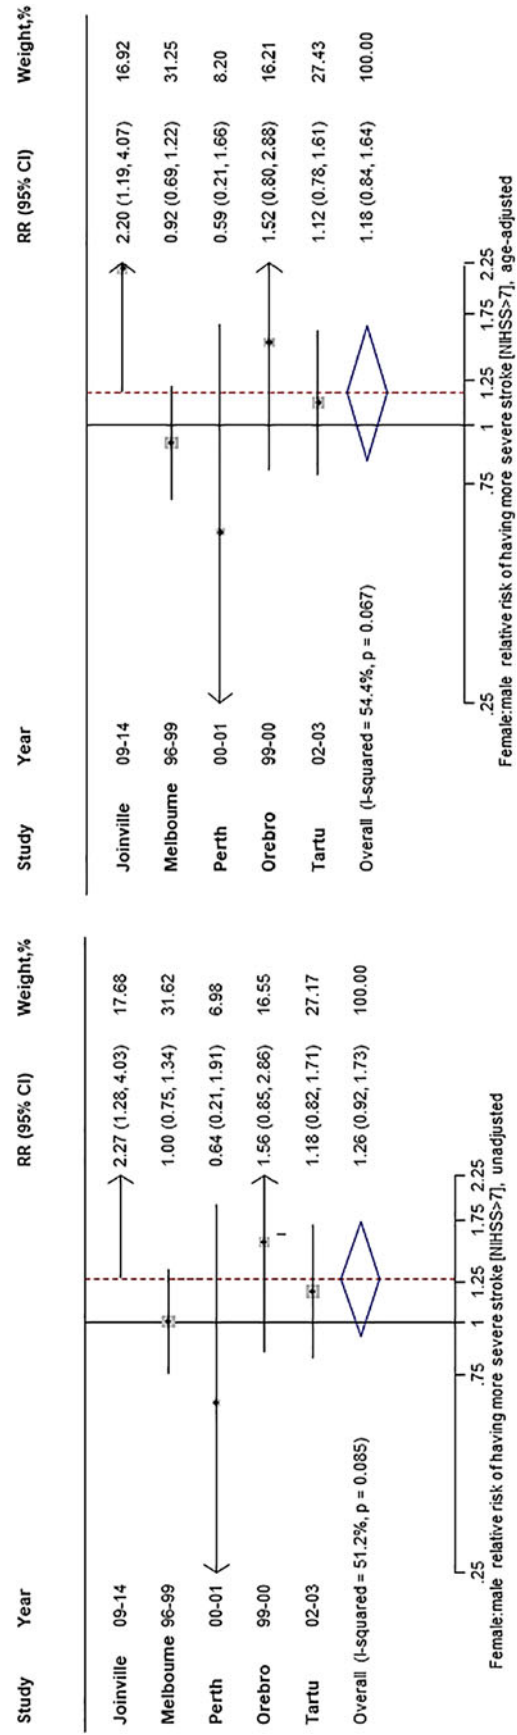

**SUPPLEMENTARY FIG. S5.** Sex differences in stroke severity among those with AF and ischemic stroke.

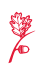

Supplement: Suppl_FigS5.pdf [file Suppl_FigS5.pdf]
